# Supplementary material for: ‘Screen and Treat for Anaemia Reduction (STAR)’ strategy: study protocol of a cluster randomised trial in rural Telangana, India
Source: HighWire-hosted journal article supplement (doi:10.1136/bmjopen-2021-052238), 2021-12-01
Supplement: bmjopen-2021-052238supp001_data_supplement.pdf [file bmjopen-2021-052238supp001_data_supplement.pdf]

Supplementary Figure 1: Colour-coded packaging of iron folic acid supplements

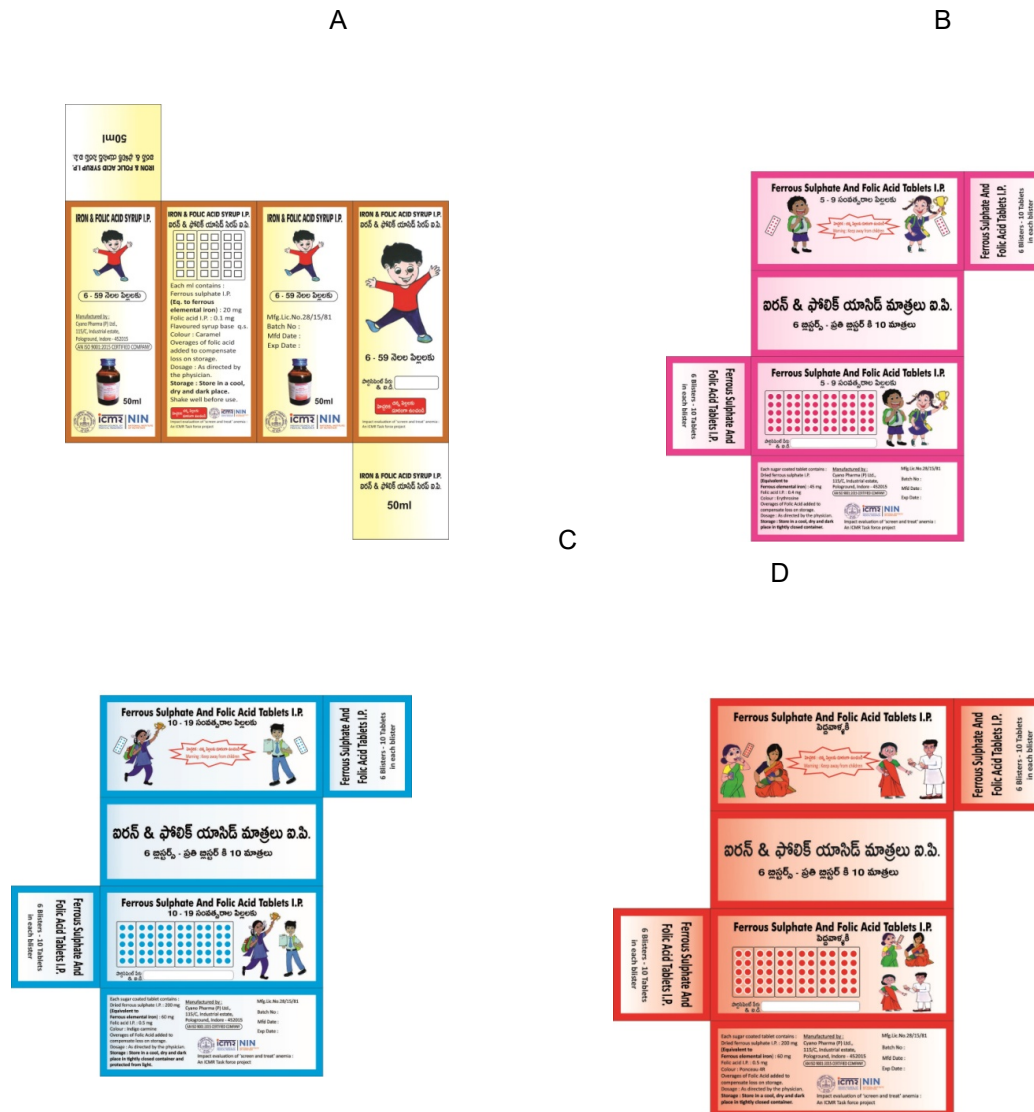

- A. Syrup bottle (for 6-59 mo);
- B. Tablets (5-9 years, 45 mg iron and 0.4 mg folic acid)
- C. Tablets (10-19 years, 60 mg iron and 0.5 mg folic acid);
- D. Tablets (adults 20-50 years, 60 mg iron and 0.5 mg folic acid)

**Supplementary Table 1. List of villages included in the sample frame**

|     | <b>Name of the village</b>       | <b>Average population served by an ASHA</b> |
|-----|----------------------------------|---------------------------------------------|
| 1.  | Anantharam                       | 1606                                        |
| 2.  | Somaram                          | 1225                                        |
| 3.  | Venkatadri Colony                | 1005                                        |
| 4.  | Ghanapur/ Lingapur / Pakkertikya | 1108                                        |
| 5.  | Lingapur                         | 1053                                        |
| 6.  | Ismailkhaguda                    | 1300                                        |
| 7.  | Bandamadharam                    | 1312                                        |
| 8.  | Baba Guda                        | 1130                                        |
| 9.  | Maripellygudem                   | 760                                         |
| 10. | Pocharam                         | 1620                                        |
| 11. | Upperpally                       | 1628                                        |
| 12. | Yamnampet                        | 1370                                        |
| 13. | Surendarreddynagar               | 1355                                        |
| 14. | Konai Pally/Maisereddypally      | 1316                                        |
| 15. | Sampanbole                       | 2065                                        |
| 16. | Jaganguda                        | 2130                                        |
| 17. | Adraspally                       | 1188                                        |
| 18. | Muneerabad                       | 2410                                        |
| 19. | Ankushapur                       | 1375                                        |
| 20. | K.Singaram                       | 2926                                        |
| 21. | Parvathapur                      | 2238                                        |
| 22. | Annojiguda                       | 1755                                        |
| 23. | Girmapur                         | 2615                                        |
| 24. | Yellampet                        | 3232                                        |
| 25. | Pratapsingaram                   | 3398                                        |
| 26. | KandlaKoya                       | 2995                                        |
| 27. | Srirangavaram                    | 1622                                        |
| 28. | Nuthankal                        | 1469                                        |
| 29. | Majidpur                         | 2453                                        |
| 30. | Koltur                           | 1314                                        |
| 31. | Uddemarry / Usharpally           | 1572                                        |
| 32. | NFC Nagar                        | 1976                                        |
| 33. | Kondapur                         | 3623                                        |
| 34. | Ghatkesar                        | 2066                                        |
| 35. | RGK                              | 2571                                        |
| 36. | Lalgadimalakpet                  | 2163                                        |
| 37. | Gowdavelli                       | 2177                                        |
| 38. | Turkapally                       | 5330                                        |
| 39. | G.P.Pally                        | 1512                                        |
| 40. | Dabilpur                         | 1813                                        |

|     |           |      |
|-----|-----------|------|
| 41. | Ravlkole  | 3047 |
| 42. | Athwelly  | 2466 |
| 43. | Edulabad  | 1066 |
| 44. | Aliabad   | 2031 |
| 45. | Aushapur  | 2076 |
| 46. | Shamirpet | 1534 |
| 47. | Pudoor    | 2215 |

**Supplementary Table 2. Anemia Mukht Bharat programme currently operational in India**

| Population                 | Per day dose                                                                                                       | First line Treatment dose of iron                                                                                                                                              | Platform for screening and treatment                                                                                           | Follow-up                                                                                                                                                                   |
|----------------------------|--------------------------------------------------------------------------------------------------------------------|--------------------------------------------------------------------------------------------------------------------------------------------------------------------------------|--------------------------------------------------------------------------------------------------------------------------------|-----------------------------------------------------------------------------------------------------------------------------------------------------------------------------|
| Children 6-59 months       | 1 mL IFA syrup (20 mg iron+100 mcg folic acid) twice in a week                                                     | 3mg/kg/day<br>6–12 months: 1 mL IFA syrup/day (20 mg iron+100 mcg folic acid)<br>1–3 years: 1.5 mL IFA syrup/day<br>3–5 years: 2 ml IFA syrup/day<br>Duration: 2 months        | <b>Screening:</b> ANM/RBSK team<br>Medical Officer: health facility (Opportunistic)<br><b>Treatment:</b> ANM/ASHA/ AWW         | Hb estimation after 2 months<br>Follow-up every month by ANM at VHND<br>Monitoring by ASHA for compliance of IFA syrup every 14 days                                        |
| 5-9 years                  | 1 IFA tablet/week (pink, 45 mg iron+400 mcg folic acid)                                                            | 3mg/kg/day<br>Duration: 2 months                                                                                                                                               | <b>Screening:</b> RBSK teams (Once a year/Opportunistic)<br><b>Treatment:</b> ANM/LHV/MPHW                                     | After 2 months Follow-up responsibility on Parents By ANM/LHV/MPW as feasible                                                                                               |
| 10-19 years (Girls & Boys) | 1 IFA tablet/ week (blue, 60 mg iron+500 mcg folic acid)                                                           | 2 IFA tablets per day (120 mg/day iron and 500 mcg folic acid)<br>Duration: 3 months                                                                                           | <b>Screening:</b> In school premises by RBSK team (Once in a year)<br><b>Treatment:</b> At school by ANM/LHV/MPHW              | After 3 months<br>Follow-up responsibility on Parents through ANM/LHV/MPHW as feasible.                                                                                     |
| Men (≥20 years)            | -----                                                                                                              | -----                                                                                                                                                                          | No screening or treatment                                                                                                      | NA                                                                                                                                                                          |
| NPNL (≥20 years)           | 1 IFA tablet/ week (red, 60 mg iron+500 mcg folic acid)                                                            | No screening or treatment                                                                                                                                                      | No screening or treatment                                                                                                      | NA                                                                                                                                                                          |
| Pregnant & lactating women | 1 IFA tablet/day (Red, 60 mg iron+500 mcg folic acid)<br>Duration: 180 days during pregnancy, 180 days post-partum | 2 IFA tablets per day (120 mg/day iron and 500 mcg folic acid)<br>Parenteral iron for women detected to be anemic late in pregnancy or in whom compliance is likely to be low. | <b>Screening:</b> Health service provider at any ANC contact<br><b>Treatment:</b> Health care provider during the ANC contact. | Every 2 months for compliance of treatment by health provider during ANC contact (Mild anemia)<br>Haemoglobin estimation of the anemic cases every Month (Moderate anemic). |

IFA, Iron and Folic acid supplement; ANM, Auxiliary Nurse and Midwife; RBSK: Rashtriya Bal Swasthya Karyakram (Programme for the welfare of children); VHND, Village health and nutrition Day; ASHA, Accredited Social Health Activist; LHV, Lady Health Visitor; MPW, Multiple Purpose Health Worker; NPNL, Non-pregnant and non-lactating woman; AWW, Angawadi worker; ANC, antenatal contact.

**Supplementary Table 3. Questionnaires**

| Sl.No | QN  | Question                     | Options                                                                                                                                                                                                                                                                                                               | Skip logic |
|-------|-----|------------------------------|-----------------------------------------------------------------------------------------------------------------------------------------------------------------------------------------------------------------------------------------------------------------------------------------------------------------------|------------|
|       |     | <b>Family Member details</b> |                                                                                                                                                                                                                                                                                                                       |            |
| 1     | 1   | S.no                         |                                                                                                                                                                                                                                                                                                                       |            |
| 2     | 2   | Name                         |                                                                                                                                                                                                                                                                                                                       |            |
| 3     | 3   | Relation With HH             | 1. Head of HH<br>2. Husband<br>3. Wife<br>4. Son<br>5. Daughter<br>6. Father<br>7. Mother<br>8. Son-in-law<br>9. Daughter-in-law<br>10. Father-in-law<br>11. Mother-in-law<br>12. Grand child<br>13. Brother<br>14. Sister<br>15. Nephew<br>16. Niece<br>17. Grand father<br>18. Grand mother<br>99. Others (specify) |            |
| 4     | 3.a | Others (Specify)             |                                                                                                                                                                                                                                                                                                                       |            |
| 5     | 4   | Gender                       | 1. Male<br>2. Female<br>99. Others                                                                                                                                                                                                                                                                                    |            |
| 6     |     | Is DOB selected              |                                                                                                                                                                                                                                                                                                                       |            |
| 7     | 5   | Date of birth                |                                                                                                                                                                                                                                                                                                                       |            |
| 8     | 6   | Age (in years)               |                                                                                                                                                                                                                                                                                                                       |            |
| 9     | 7   | Age (in months)              |                                                                                                                                                                                                                                                                                                                       |            |
| 10    | 8   | Marital status               | 1. N/A<br>2. Single (Never married)<br>3. Married<br>4. Married but separated<br>5. Divorced & not remarried                                                                                                                                                                                                          |            |

|    |      |                                                                             |                                                                                                                                                                                                            |  |
|----|------|-----------------------------------------------------------------------------|------------------------------------------------------------------------------------------------------------------------------------------------------------------------------------------------------------|--|
|    |      |                                                                             | 6. Widowed & not remarried                                                                                                                                                                                 |  |
| 11 | 9    | Physiological status code                                                   | 1. N/A<br>2. NPNL<br>3. Pregnant<br>4. Lactating                                                                                                                                                           |  |
| 12 | 10   | Literacy level                                                              | 1. N/A<br>2. Illiterate<br>3. Literacy (only sign )<br>4. Literacy (only read )<br>5. Literacy (read & write)                                                                                              |  |
| 13 | 11   | Education                                                                   | 1. N/A<br>2. 1 - 5 <sup>th</sup> class<br>3. 6 - 10 <sup>th</sup> class<br>4. Intermediate<br>5. Graduate<br>6. Post graduate & above                                                                      |  |
| 14 | 12   | Sub occupation                                                              | <u>List</u>                                                                                                                                                                                                |  |
| 15 | 12.a | Occupation                                                                  | 1. N/A<br>2. Professional/ Technical / Managerial<br>3. Clerical<br>4. Sales<br>5. Services / household and domestic<br>6. Agricultural<br>7. Skilled and unskilled manual<br>8. Student<br>9. Not working |  |
| 16 | 13   | Will the member be residing in the current residence for the next 6 months? | 1. Yes<br>2. No                                                                                                                                                                                            |  |
| 17 | 14   | Same as HH                                                                  | 1. Yes                                                                                                                                                                                                     |  |
| 18 | 15   | Mobile Number<br>(Enter 9999999999 if not available)                        |                                                                                                                                                                                                            |  |
| 19 | 16   | Landline number                                                             |                                                                                                                                                                                                            |  |
| 20 | 17   | Aadhaar card number                                                         |                                                                                                                                                                                                            |  |

| SINo<br>QN         |     | Question                                                          | Options                                                                                                 | Skiplogic |
|--------------------|-----|-------------------------------------------------------------------|---------------------------------------------------------------------------------------------------------|-----------|
| Standard of living |     |                                                                   |                                                                                                         |           |
| 1                  | 1   | Religion of the family                                            | 1. Hindu<br>2. Christian<br>3. Muslim<br>99.Others (Specify)                                            |           |
| 2                  | 1.a | Others (Specify)                                                  |                                                                                                         |           |
| 3                  | 2   | Caste of family                                                   | 1. General<br>2. Backward Community (BC)<br>3. Scheduled Caste (SC)<br>4. Scheduled Tribe (ST)          |           |
| 4                  | 3   | Is your house a Pucca one or kutcha?                              | 1. Pucca<br>2. Semi-pucca<br>3. Kutcha                                                                  |           |
| 5                  | 4   | What type of house you are living?                                | 1. Own<br>2. Rent                                                                                       |           |
| 6                  | 5   | How many rooms are there in the house ?                           |                                                                                                         |           |
| 7                  | 6   | Is there a separate kitchen in your home?                         | 1. Yes<br>2. No                                                                                         |           |
| 8                  | 7   | What is the main source of cooking fuel used in your house hold ? | 1. LPG<br>2. Coal<br>3. Kerosene<br>4. Firewood<br>5. Electricity<br>6. Biogas<br>99. Others (Specify ) |           |
| 9                  | 7.a | Others (Specify)                                                  |                                                                                                         |           |
| 10                 | 8   | Is there a vent in your cooking area?                             | 1. Yes<br>2. No                                                                                         |           |



|    |      |                                                  |                                                                                                                                   |                                                      |
|----|------|--------------------------------------------------|-----------------------------------------------------------------------------------------------------------------------------------|------------------------------------------------------|
| 11 | 9    | What is the main source of drinking water?       | 1. Tap Water at residence<br>2. Mineral water<br>3. RO water<br>4. Public tap<br>5. Hand pump<br>6. Well<br>99. Others (Specify ) |                                                      |
| 12 | 9.a  | Others (Specify)                                 |                                                                                                                                   |                                                      |
| 13 | 10   | Main source of lighting ?                        | 1. Electricity<br>2. kerosene / Gas / Oil<br>3. Coal / Coke / Lignite<br>99.Others (Specify)                                      |                                                      |
| 14 | 10.a | Others (Specify)                                 |                                                                                                                                   |                                                      |
| 15 | 11   | Do you have toilet in the house?                 | 1. No facility<br>2. Own flush toilet<br>3. Shared or public pit toilet<br>4. Public or shared flush toilet or own pit toilet     |                                                      |
| 16 | 12   | Do people in your area practice open defecation? | 1. Yes<br>2. No                                                                                                                   |                                                      |
| 17 | 13   | Do you have any pets at home ?                   | 1. Yes<br>2. No                                                                                                                   | If no, skip to Q. 15<br>IF Yes then goto Question 14 |
| 18 | 14   | Please mention the pets                          |                                                                                                                                   |                                                      |
| 19 | 14.a | Cow                                              | 1. Yes<br>2. No                                                                                                                   |                                                      |
| 20 | 14.b | Buffalo                                          | 1. Yes<br>2. No                                                                                                                   |                                                      |
| 21 | 14.c | Pig                                              | 1. Yes<br>2. No                                                                                                                   |                                                      |
| 22 | 14.d | Poultry (Chicken/ Duck/ Turkey)                  | 1. Yes<br>2. No                                                                                                                   |                                                      |
| 23 | 14.e | Goat                                             | 1. Yes<br>2. No                                                                                                                   |                                                      |

|    |      |                                              |                 |  |
|----|------|----------------------------------------------|-----------------|--|
| 24 | 14.f | Dog                                          | 1. Yes<br>2. No |  |
| 25 | 14.g | Others                                       | 1. Yes<br>2. No |  |
| 26 | 14.h | Others (Specify)                             |                 |  |
| 27 | 15   | Please mention the animals in your vicinity? |                 |  |
| 28 | 15.a | Cow                                          | 1. Yes<br>2. No |  |
| 29 | 15.b | Buffalo                                      | 1. Yes<br>2. No |  |
| 30 | 15.c | Pig                                          | 1. Yes<br>2. No |  |
| 31 | 15.d | Poultry (Chicken/ Duck/ Turkey)              | 1. Yes<br>2. No |  |
| 32 | 15.e | Goat                                         | 1. Yes<br>2. No |  |
| 33 | 15.f | Dog                                          | 1. Yes<br>2. No |  |
| 34 | 15.g | Others                                       | 1. Yes<br>2. No |  |
| 35 | 15.h | Others (Specify)                             |                 |  |
| 36 | 1    | Chair                                        | 1. Yes<br>2. No |  |
| 37 | 2    | Table                                        | 1. Yes<br>2. No |  |
| 38 | 3    | Cot                                          | 1. Yes<br>2. No |  |
| 39 | 4    | Mattress                                     | 1. Yes<br>2. No |  |
| 40 | 5    | Wall clock/ Wrist watch                      | 1. Yes<br>2. No |  |
| 41 | 6    | Telephone/ Mobile                            | 1. Yes<br>2. No |  |
| 42 | 7    | Electric fan                                 | 1. Yes          |  |

|    |      |                          |                                 |                                                                     |
|----|------|--------------------------|---------------------------------|---------------------------------------------------------------------|
|    |      |                          | 2. No                           |                                                                     |
| 43 | 8    | Refrigerator             | 1. Yes<br>2. No                 |                                                                     |
| 44 | 9    | Pressure cooker          | 1. Yes<br>2. No                 |                                                                     |
| 45 | 10   | Stitching machine        | 1. Yes<br>2. No                 |                                                                     |
| 46 | 11   | Radio                    | 1. Yes<br>2. No                 |                                                                     |
| 47 | 12.a | Television (TV)          | 1. Yes<br>2. No                 | If 2 then skip to<br>question 13<br>If 1 then goto<br>Question 12.b |
| 48 | 12.b | If TV is present,        | 1. Colour<br>2. Black and White |                                                                     |
| 49 | 13   | Computer/ Laptop         | 1. Yes<br>2. No                 |                                                                     |
| 50 | 14   | Cycle                    | 1. Yes<br>2. No                 |                                                                     |
| 51 | 15   | Scooter                  | 1. Yes<br>2. No                 |                                                                     |
| 52 | 16   | Car/ Tractor             | 1. Yes<br>2. No                 |                                                                     |
| 53 | 17   | A bullock cart           | 1. Yes<br>2. No                 |                                                                     |
| 54 | 18   | Water pump (at resident) | 1. Yes<br>2. No                 |                                                                     |
| 55 | 19   | Thresher                 | 1. Yes<br>2. No                 |                                                                     |
| 56 | 20   | Others                   |                                 |                                                                     |

**Proforma to capture dietary diversity**

| SINo | QN | Question             | Choice                                                                                                    | Skip logic |
|------|----|----------------------|-----------------------------------------------------------------------------------------------------------|------------|
|      |    | <b>Meals Details</b> |                                                                                                           |            |
| 1    | 1  | Meal pattern         | 1. Early morning<br>2. Break Fast<br>3. Mid morning<br>4. Lunch<br>5. Evening<br>6. Dinner<br>7. Bed time |            |
| 2    | 2  | Recipe               |                                                                                                           |            |
| 3    | 3  | Cooked type          | 1. Cooked at home<br>2. Outside food                                                                      |            |
| 4    | 4  | Ingredients          | <u>List</u>                                                                                               |            |
| 5    | 5  | Others               |                                                                                                           |            |

**6-59 months old children**

| SINo | QN                                                                                                               | Question                                                                                      | Options                                                                                                                     |
|------|------------------------------------------------------------------------------------------------------------------|-----------------------------------------------------------------------------------------------|-----------------------------------------------------------------------------------------------------------------------------|
|      | <b>Section 1 - General information</b>                                                                           |                                                                                               |                                                                                                                             |
| 1    | 1                                                                                                                | Respondent                                                                                    | 1. Mother<br>2. Others                                                                                                      |
| 2    | 2                                                                                                                | Respondent name                                                                               |                                                                                                                             |
| 3    | 3                                                                                                                | Name of the mother                                                                            |                                                                                                                             |
| 4    | 3.a                                                                                                              | Others (Specify)                                                                              |                                                                                                                             |
| 5    | 4                                                                                                                | Name of the father                                                                            |                                                                                                                             |
| 6    | 4.a                                                                                                              | Others (Specify)                                                                              |                                                                                                                             |
| 7    | 5                                                                                                                | Date of birth of the child                                                                    |                                                                                                                             |
| 8    | 6                                                                                                                | Birth weight of the child is reported through                                                 | 1. Record<br>2. Recall<br>3. Not Available<br>77. Don't Know                                                                |
| 9    | 7                                                                                                                | Birth weight (Kg) of the child                                                                |                                                                                                                             |
|      | <b>Section 2. Participation in government programs</b>                                                           |                                                                                               |                                                                                                                             |
| 10   | 8.a                                                                                                              | Does the child receive take home ration (THR)?                                                | 1. Yes<br>2. No                                                                                                             |
| 11   | 8.b                                                                                                              | For how many days have the child consumed THR in previous month?                              |                                                                                                                             |
| 12   | 8.c                                                                                                              | What was the quantity of balamrutham consumed by the child in the previous month?             | 1. Fully consumed<br>2. More than half consumed<br>3. Half consumed<br>4. Less than half consumed<br>5. Not consumed at all |
| 13   | 8.d                                                                                                              | How many eggs were consumed by the child in the previous month that was supplied through THR? |                                                                                                                             |
| 14   | 9                                                                                                                | Does the child go to anganwadi center (AWC) for meal?                                         | 1. Yes<br>2. No                                                                                                             |
| 15   | 10                                                                                                               | For how many days did the child consume meals from AWC in previous month?                     |                                                                                                                             |
|      | <b>Section 3. History of screening and treating for anemia(Instruction:- Past 6 months means count backwards</b> |                                                                                               |                                                                                                                             |

3

|    | from the month of survey till 6 months) |                                                                                                                                   |                                                                                                                                                             |
|----|-----------------------------------------|-----------------------------------------------------------------------------------------------------------------------------------|-------------------------------------------------------------------------------------------------------------------------------------------------------------|
| 16 | 11.a                                    | Did your child undergo any blood test to detect hemoglobin levels in the past 6 months?<br>(If age > 1 year, count last 6 months) | 1. Yes<br>2. No                                                                                                                                             |
| 17 | 11.b                                    | Where was the test done?                                                                                                          | 1. Government<br>2. Private                                                                                                                                 |
| 18 | 11.c                                    | After blood test, how do you want to report hemoglobin level of your child?                                                       | 1. Record<br>2. Recall<br>3. Don't know                                                                                                                     |
| 19 | 11.d                                    | Hemoglobin level (value in g/dl)                                                                                                  |                                                                                                                                                             |
| 20 | 11.e                                    | Based on report/recall what is your perception on status of the child?                                                            | 1. Anemic<br>2. Non anemic                                                                                                                                  |
| 21 | 12.a                                    | Did you receive/buy iron syrups for your child?                                                                                   | 1. Yes<br>2. No                                                                                                                                             |
| 22 | 12.b                                    | Where did you receive/ buy iron syrups for your child?                                                                            | 1. Primary health center<br>2. Sub-Centre<br>3. Government hospital<br>4. Private hospital<br>5. Private lab<br>6. Private pharmacy<br>99. Others (Specify) |
| 23 | 12.b.1                                  | Others (Specify)                                                                                                                  |                                                                                                                                                             |
| 24 | 13                                      | If you have not given/consumed/received iron syrups/ tablets to your child, please mention why?                                   |                                                                                                                                                             |
| 25 | 13.1                                    | Side effects                                                                                                                      | 1. Yes<br>2. No<br>3. Don't know                                                                                                                            |
| 26 | 13.2                                    | Costly                                                                                                                            | 1. Yes<br>2. No<br>3. Don't know                                                                                                                            |
| 27 | 13.3                                    | Forget to give the syrup                                                                                                          | 1. Yes<br>2. No<br>3. Don't know                                                                                                                            |
| 28 | 13.4                                    | Child dislikes the taste                                                                                                          | 1. Yes<br>2. No<br>3. Don't know                                                                                                                            |
| 29 | 13.5                                    | Healthy food is enough                                                                                                            | 1. Yes<br>2. No<br>3. Don't know                                                                                                                            |

|                                                                          |        |                                                                                                                                                                                                                                                              |                                  |
|--------------------------------------------------------------------------|--------|--------------------------------------------------------------------------------------------------------------------------------------------------------------------------------------------------------------------------------------------------------------|----------------------------------|
| 30                                                                       | 13.6   | Don't think it's necessary                                                                                                                                                                                                                                   | 1. Yes<br>2. No<br>3. Don't know |
| 31                                                                       | 13.7   | Others                                                                                                                                                                                                                                                       | 1. Yes<br>2. No                  |
| 32                                                                       | 13.8   | Others (Specify)                                                                                                                                                                                                                                             |                                  |
| <b>Section 4. Current status</b>                                         |        |                                                                                                                                                                                                                                                              |                                  |
| 33                                                                       | 14.a   | Are you giving iron syrups currently to your child?                                                                                                                                                                                                          | 1. Yes<br>2. No                  |
| 34                                                                       | 14.b   | Please provide the detailed information on the iron syrups consumed by the child (Please show a wrapper for reference) (Instruction: Record this information from the iron tablet blisters/bottles available with the participant and upload the photograph) |                                  |
| 35                                                                       | 14.b.1 | Brand                                                                                                                                                                                                                                                        |                                  |
| 36                                                                       | 14.b.2 | Company                                                                                                                                                                                                                                                      |                                  |
| 37                                                                       | 14.b.3 | Dose                                                                                                                                                                                                                                                         |                                  |
| 38                                                                       | 14.b.4 | Upload photo                                                                                                                                                                                                                                                 |                                  |
| <b>Section 5. Prophylactic iron supplementation for anemia reduction</b> |        |                                                                                                                                                                                                                                                              |                                  |
| 39                                                                       | 15.a   | Did you receive any iron syrups from Government for your child in the past Six months?                                                                                                                                                                       | 1. Yes<br>2. No                  |
| 40                                                                       | 15.b   | From whom/ from where did you receive the iron syrups?                                                                                                                                                                                                       |                                  |
| 41                                                                       | 15.b.1 | Primary health center                                                                                                                                                                                                                                        | 1. Yes<br>2. No                  |
| 42                                                                       | 15.b.2 | Sub – centre                                                                                                                                                                                                                                                 | 1. Yes<br>2. No                  |
| 43                                                                       | 15.b.3 | Government hospital                                                                                                                                                                                                                                          | 1. Yes<br>2. No                  |
| 44                                                                       | 15.b.4 | Others                                                                                                                                                                                                                                                       | 1. Yes<br>2. No                  |
| 45                                                                       | 15.b.5 | Others (Specify)                                                                                                                                                                                                                                             |                                  |
| 46                                                                       | 15.c   | How many bottles of iron syrups did you receive for your child in the past 6 months?<br>(Please indicate the total number of bottles. If the participant provides the number of bottles)                                                                     |                                  |

|                                                         |        |                                                                                                                                                            |                                     |
|---------------------------------------------------------|--------|------------------------------------------------------------------------------------------------------------------------------------------------------------|-------------------------------------|
| 47                                                      | 16     | If you have not received/ taken the bottle, please mention why?                                                                                            |                                     |
| 48                                                      | 16.1   | No supply                                                                                                                                                  | 1. Yes<br>2. No                     |
| 49                                                      | 16.2   | Not interested                                                                                                                                             | 1. Yes<br>2. No                     |
| 50                                                      | 16.3   | Forgot                                                                                                                                                     | 1. Yes<br>2. No                     |
| 51                                                      | 16.4   | No time                                                                                                                                                    | 1. Yes<br>2. No                     |
| 52                                                      | 16.5   | Healthy food is enough                                                                                                                                     | 1. Yes<br>2. No                     |
| 53                                                      | 16.6   | Side effects                                                                                                                                               | 1. Yes<br>2. No                     |
| 54                                                      | 16.7   | Others                                                                                                                                                     | 1. Yes<br>2. No                     |
| 55                                                      | 16.8   | Others (Specify)                                                                                                                                           |                                     |
| <b>Section 6. History on consumption of iron syrups</b> |        |                                                                                                                                                            |                                     |
| 56                                                      | 17.a   | Have/Had you given iron syrups regularly to your child in the past six months?                                                                             | 1. Yes<br>2. No                     |
| 57                                                      | 17.b   | What is the frequency of giving iron syrups to your child?                                                                                                 | 1. Daily<br>2. Weekly<br>3. Monthly |
| 58                                                      | 17.c.1 | How many days did your child consume the syrup in a week?                                                                                                  |                                     |
| 59                                                      | 17.c.2 | How many days did the child consume the syrup in a month?                                                                                                  |                                     |
| 60                                                      | 17.d   | How many syrup bottles have you given to your child in a month?<br>(Instruction: Please provide the number of tablets)                                     |                                     |
| 61                                                      | 17.e   | For how many months did you give iron syrup to your child?<br>(Instruction: History of IFA iron syrup consumption. Count backwards from the current month) |                                     |
| 62                                                      | 17.f   | What is the quantity of syrup given to the child (in ml)?<br>(Approximate quantity of syrup consumed to be understood from the bottle and the measuring    |                                     |



|    |        |                                                                                          |                                                                    |
|----|--------|------------------------------------------------------------------------------------------|--------------------------------------------------------------------|
|    |        | cup/spoon used. If spoon, 1tsp=5ml and 1 tbsp=10ml)                                      |                                                                    |
| 63 | 17.g   | What is the time of the day when you give the iron syrup to your child?                  | 1. Before meal<br>2. Immediately after meal<br>99.Others (Specify) |
| 64 | 17.g.1 | Others (Specify)                                                                         |                                                                    |
| 65 | 17.h   | Did your child experience any side effects while taking the syrup?                       | 1. Yes<br>2. No                                                    |
| 66 | 17.i   | If your child experienced any side effects while taking the iron syrup, please list them |                                                                    |
| 67 | 17.i.1 | Constipation                                                                             | 1. Yes<br>2. No                                                    |
| 68 | 17.i.2 | Diarrhea                                                                                 | 1. Yes<br>2. No                                                    |
| 69 | 17.i.3 | Nausea/vomiting                                                                          | 1. Yes<br>2. No                                                    |
| 70 | 17.i.4 | Pain in abdomen                                                                          | 1. Yes<br>2. No                                                    |
| 71 | 17.i.5 | Black stools                                                                             | 1. Yes<br>2. No                                                    |
| 72 | 17.i.6 | Others                                                                                   | 1. Yes<br>2. No                                                    |
| 73 | 17.i.7 | Others (Specify)                                                                         |                                                                    |
| 74 | 17.j   | What did you do after your child experienced the side-effects?                           |                                                                    |
| 75 | 17.j.1 | Stopped giving syrups completely                                                         | 1. Yes<br>2. No                                                    |
| 76 | 17.j.2 | Stopped for few days and continued                                                       | 1. Yes<br>2. No                                                    |
| 77 | 17.j.3 | Changed doctor                                                                           | 1. Yes<br>2. No                                                    |
| 78 | 17.j.4 | Continued in spite of side effects                                                       | 1. Yes<br>2. No                                                    |
| 79 | 17.j.5 | Others                                                                                   | 1. Yes<br>2. No                                                    |
| 80 | 17.j.6 | Others (Specify)                                                                         |                                                                    |

|    |                                                                                     |                                                                                                                                                                                        |                                                                                                                                                                                   |
|----|-------------------------------------------------------------------------------------|----------------------------------------------------------------------------------------------------------------------------------------------------------------------------------------|-----------------------------------------------------------------------------------------------------------------------------------------------------------------------------------|
| 81 | 18                                                                                  | If you are not giving iron syrups or not giving regularly to your child, please mention why??                                                                                          |                                                                                                                                                                                   |
| 82 | 18.1                                                                                | Forgot to give iron syrup                                                                                                                                                              | 1. Yes<br>2. No                                                                                                                                                                   |
| 83 | 18.2                                                                                | Side effects                                                                                                                                                                           | 1. Yes<br>2. No                                                                                                                                                                   |
| 84 | 18.3                                                                                | Not interested                                                                                                                                                                         | 1. Yes<br>2. No                                                                                                                                                                   |
| 85 | 18.4                                                                                | No time                                                                                                                                                                                | 1. Yes<br>2. No                                                                                                                                                                   |
| 86 | 18.5                                                                                | Costly                                                                                                                                                                                 | 1. Yes<br>2. No                                                                                                                                                                   |
| 87 | 18.6                                                                                | Healthy food is enough                                                                                                                                                                 | 1. Yes<br>2. No                                                                                                                                                                   |
| 88 | 18.7                                                                                | Others                                                                                                                                                                                 | 1. Yes<br>2. No                                                                                                                                                                   |
| 89 | 18.8                                                                                | Others (Specify)                                                                                                                                                                       |                                                                                                                                                                                   |
|    | <b>Section 7. Information on habitual intake of foods affecting iron absorption</b> |                                                                                                                                                                                        |                                                                                                                                                                                   |
| 90 | 19                                                                                  | Does your child have the habit of taking tea or coffee along with meals?                                                                                                               | 1. Yes, always<br>2. Yes, sometimes<br>3. No<br>4. Don't have the habit of taking tea/coffee                                                                                      |
| 91 | 20                                                                                  | Does your child have the habit of eating fruits such as guava/ orange/ papaya along with meals?<br>(Instruction: The response will pertain to the intake of any of these three fruits) | 1. Yes, always<br>2. Yes, sometimes<br>3. No<br>4. Don't have the habit of eating these fruits                                                                                    |
| 92 | 21                                                                                  | How frequently does your child eat non-vegetarian food?                                                                                                                                | 1. No, he/she don't eat non-veg<br>2. Yes, once in a while<br>3. Yes, once in a month<br>4. Yes, weekly once<br>5. Yes, weekly 2-3 times<br>6. Yes, daily<br>7. Weekly, 4-6 times |
| 93 | 22.a                                                                                | Did your child consume fortified beverages in the last one month?<br>(Instruction: fortified beverages examples are horlicks,                                                          | 1. Yes<br>2. No                                                                                                                                                                   |

|     |                                        |                                                                                                                                                                                                                                                                   |                                                                                              |
|-----|----------------------------------------|-------------------------------------------------------------------------------------------------------------------------------------------------------------------------------------------------------------------------------------------------------------------|----------------------------------------------------------------------------------------------|
|     |                                        | boost, complan)                                                                                                                                                                                                                                                   |                                                                                              |
| 94  | 22.b                                   | Approximately, how frequently does your child consume the fortified beverages                                                                                                                                                                                     | 1. Daily<br>2. Weekly 2-3 times<br>3. Weekly once<br>4. Monthly once<br>5. Weekly, 4-6 times |
|     | <b>Section 8. Morbidity</b>            |                                                                                                                                                                                                                                                                   |                                                                                              |
| 95  | 23                                     | Did your child suffer from fever/cold during the past two weeks?                                                                                                                                                                                                  | 1. Yes<br>2. No                                                                              |
| 96  | 24                                     | Did your child suffer from acute respiratory tract infection during the past two weeks?<br>(Instruction : Fever lasting for more than 3 days along with breathing difficulty)<br>(Instruction: For babies 'fast breathing' can be used to elicit the information) | 1. Yes<br>2. No                                                                              |
| 97  | 25                                     | Did your child have diarrhoea during the past two weeks?<br>(loose stools - 6 or more episodes/day, requiring medication)                                                                                                                                         | 1. Yes<br>2. No                                                                              |
| 98  | 26                                     | Did your child suffer from vomiting/ nausea in the past two weeks?                                                                                                                                                                                                | 1. Yes<br>2. No                                                                              |
| 99  | 27                                     | Did your child suffer from pneumonia/ bronchitis in the past two weeks?                                                                                                                                                                                           | 1. Yes<br>2. No                                                                              |
|     | <b>Section 9. Height &amp; Weight</b>  |                                                                                                                                                                                                                                                                   |                                                                                              |
| 100 | 28                                     | Height (In cm)                                                                                                                                                                                                                                                    |                                                                                              |
| 101 | 29                                     | Weight (In Kg)                                                                                                                                                                                                                                                    |                                                                                              |
|     | <b>Section 9. History of deworming</b> |                                                                                                                                                                                                                                                                   |                                                                                              |
| 102 | 30                                     | Did the child receive de-worming tablets/Syrup in past one year from the date of survey?                                                                                                                                                                          | 1 - Yes<br>2 - No<br>77 - Don't know                                                         |
| 103 | 31                                     | How many times did he/ she receive deworming tablets/Syrup in the past one year from the date of survey?                                                                                                                                                          | 1 - Once<br>2 - Twice<br>77 - Not sure                                                       |

**5-9 year old children**

| SINo | QN  | Question                                                                                                     | Options                                        | Skiplogic                                                   |
|------|-----|--------------------------------------------------------------------------------------------------------------|------------------------------------------------|-------------------------------------------------------------|
|      |     | <b>Section 1-General information:</b>                                                                        |                                                |                                                             |
| 1    | 1   | Respondent                                                                                                   | 1. Mother<br>2. Others                         |                                                             |
| 2    | 2   | Respondent name                                                                                              |                                                |                                                             |
| 3    | 3   | Name of the mother                                                                                           |                                                |                                                             |
| 4    | 3.a | Others (Specify)                                                                                             |                                                |                                                             |
| 5    | 4   | Name of the father                                                                                           |                                                |                                                             |
| 6    | 4.a | Others (Specify)                                                                                             |                                                |                                                             |
| 7    | 5   | Date of birth of the child                                                                                   |                                                |                                                             |
| 8    | 6   | Address of the school<br>(Instruction: If the child is 'Not studying', write 'Not studying' in the text box) |                                                |                                                             |
| 9    | 7   | Type of school the child is studying                                                                         | 1. Government<br>2. Private<br>3. Not studying | If 2. Private, skip to Question number 9                    |
|      |     | <b>Section 2 - Participation in government programs</b>                                                      |                                                |                                                             |
| 10   | 8.a | Does the child receive mid-day meals?                                                                        | 1. Yes<br>2. No                                | If no, skip to question 9                                   |
| 11   | 8.b | How many days did the child take part in the mid-day meal program in the previous month                      |                                                |                                                             |
| 12   | 8.c | Does the child go to anganwadi centre for meal?                                                              | 1. Yes<br>2. No                                | If no, skip to question 9                                   |
| 13   | 8.d | How many days did the child consume meal from the anganwadi centre in the previous month?                    |                                                |                                                             |
| 14   | 9   | Did the child receive de-worming tablets in past one year from the date of survey?                           | 1. Yes<br>2. No<br>77. Don't know              | If 2 or 77 skip to Section 3<br>If 1 - yes goto question 10 |

|    |        |                                                                                                                                                                                                      |                                                                                                                                                               |                                                |
|----|--------|------------------------------------------------------------------------------------------------------------------------------------------------------------------------------------------------------|---------------------------------------------------------------------------------------------------------------------------------------------------------------|------------------------------------------------|
| 15 | 10     | How many times did he/ she receive tablets in the past one year from the date of survey?                                                                                                             | 1. Once<br>2. Twice<br>3. Not sure                                                                                                                            |                                                |
|    |        | <b>Section 3: History of screening and treating for anemia - past history of anemia for 6 months</b><br><b>(Instruction: Past 6 months refers to the previous 6 months from the month of survey)</b> |                                                                                                                                                               |                                                |
| 16 | 11.a   | Did your child undergo any blood test to detect hemoglobin levels in the past 6 months? (If age > 1 year, count last 6 months)?                                                                      | 1. Yes<br>2. No                                                                                                                                               | If no, skip to Q.12<br>If 1 goto question 11.b |
| 17 | 11.b   | Where was the test done?                                                                                                                                                                             | 1. Government<br>2. Private                                                                                                                                   |                                                |
| 18 | 11.c   | How do you want to report the hemoglobin level?                                                                                                                                                      | 1. Record<br>2. Recall<br>77. Don't know                                                                                                                      | If 1 and 2, go to 11.d, If 77 Skip to 11.e     |
| 19 | 11.d   | Hemoglobin level (value in g/dl)                                                                                                                                                                     |                                                                                                                                                               |                                                |
| 20 | 11.e   | Based on report/recall what is your perception on status of the child?                                                                                                                               | 1. Anemic<br>2. Non anemic                                                                                                                                    |                                                |
| 21 | 12.a   | Did you receive/buy iron tablets/ iron syrups for your child?                                                                                                                                        | 1. Yes<br>2. No                                                                                                                                               | If no, skip to Q.14<br>If 1 goto question 12.b |
| 22 | 12.b   | From where did you receive/buy iron syrups/ tablets for your child?                                                                                                                                  | 1. Primary health center<br>2. Sub – Centre<br>3. Government hospital<br>4. Private hospital<br>5. Private lab<br>6. Private pharmacy<br>99. Others (Specify) |                                                |
| 23 | 12.b.1 | Others (Specify)                                                                                                                                                                                     |                                                                                                                                                               |                                                |

|    |      |                                                                                                                                                           |                                                                                                      |                                                                                                                                                                                                                                                                                                                                         |
|----|------|-----------------------------------------------------------------------------------------------------------------------------------------------------------|------------------------------------------------------------------------------------------------------|-----------------------------------------------------------------------------------------------------------------------------------------------------------------------------------------------------------------------------------------------------------------------------------------------------------------------------------------|
| 24 | 13   | Did your child consume the tablets/syrups received by you?<br>(Instruction: elicit information on habitual consumption/ attitude towards tablet or syrup) | 1. Tablet<br>2. Syrup<br>3. Both iron tablet and syrup<br>4. Didn't consume (either tablet or syrup) | If "1. tablet, 2. syrup, 3. both iron tablet and syrup", then skip to section 4. If "4. didnt consume" go to question 14. If 1. Tablet, must fill section VI<br>If 2. syrup, must fill section VII<br>If 3. both tablet and syrup, must fill section VI & VII. If 4. Didn't consume (either tablet / syrup) disable section VI and VII. |
| 25 | 14   | If you have not given/consumed/recieved iron syrups/tablets to your child, please mention why?                                                            |                                                                                                      |                                                                                                                                                                                                                                                                                                                                         |
| 26 | 14.1 | Side effects                                                                                                                                              | 1. Yes<br>2. No                                                                                      |                                                                                                                                                                                                                                                                                                                                         |
| 27 | 14.2 | Costly                                                                                                                                                    | 1. Yes<br>2. No                                                                                      |                                                                                                                                                                                                                                                                                                                                         |
| 28 | 14.3 | Forget to give the syrup                                                                                                                                  | 1. Yes<br>2. No                                                                                      |                                                                                                                                                                                                                                                                                                                                         |
| 29 | 14.4 | Child dislike the taste                                                                                                                                   | 1. Yes<br>2. No                                                                                      |                                                                                                                                                                                                                                                                                                                                         |
| 30 | 14.5 | Healthy food is enough                                                                                                                                    | 1. Yes<br>2. No                                                                                      |                                                                                                                                                                                                                                                                                                                                         |
| 31 | 14.6 | Don't think it's necessary                                                                                                                                | 1. Yes<br>2. No                                                                                      |                                                                                                                                                                                                                                                                                                                                         |
| 32 | 14.7 | Others                                                                                                                                                    | 1. Yes<br>2. No                                                                                      | If no, disable 14.8                                                                                                                                                                                                                                                                                                                     |
| 33 | 14.8 | Others (Specify)                                                                                                                                          |                                                                                                      |                                                                                                                                                                                                                                                                                                                                         |
|    |      | <b>Section 4 - Current status</b>                                                                                                                         |                                                                                                      |                                                                                                                                                                                                                                                                                                                                         |

|    |        |                                                                                                                                                                                                                                                               |                                                                                                      |                                                                                                                                                                                                                                  |
|----|--------|---------------------------------------------------------------------------------------------------------------------------------------------------------------------------------------------------------------------------------------------------------------|------------------------------------------------------------------------------------------------------|----------------------------------------------------------------------------------------------------------------------------------------------------------------------------------------------------------------------------------|
| 34 | 15.a   | Are you giving iron tablets/syrups currently to your child?                                                                                                                                                                                                   | 1. Tablet<br>2. Syrup<br>3. Both iron tablet and syrup<br>4. Didn't consume (either tablet or syrup) | If 1. Tablet, must fill section VI<br>If 2. syrup, must fill section VII<br>If 3. both tablet and syrup, must fill section VI & VII. If 4. Didn't consume (either tablet / syrup) fill section 5 and disable section VI and VII. |
| 35 | 15.b   | Please provide the detailed information on the iron tablets/syrups consumed by you (Please show a wrapper for reference)(Instruction: Record this information from the iron tablet blisters/bottles available with the participant and upload the photograph) |                                                                                                      |                                                                                                                                                                                                                                  |
| 36 | 15.b.1 | Brand                                                                                                                                                                                                                                                         |                                                                                                      |                                                                                                                                                                                                                                  |
| 37 | 15.b.2 | Company                                                                                                                                                                                                                                                       |                                                                                                      |                                                                                                                                                                                                                                  |
| 38 | 15.b.3 | Dose                                                                                                                                                                                                                                                          |                                                                                                      |                                                                                                                                                                                                                                  |
|    | 15.b.4 | Upload PHOTO                                                                                                                                                                                                                                                  |                                                                                                      |                                                                                                                                                                                                                                  |
|    |        | <b>Section 5 - Prophylactic iron supplementation for anemia reduction</b>                                                                                                                                                                                     |                                                                                                      |                                                                                                                                                                                                                                  |
| 39 | 16.a   | Did you receive any iron tablets /syrups from government for your child in the past six months?                                                                                                                                                               | 1. Yes<br>2. No                                                                                      | If no, skip to Q. 17<br>If 1 go to question 16.b.1<br>If 1.Yes, then de-activate Q.17                                                                                                                                            |
| 40 | 16.b   | From whom/from where did you receive the iron tablets /syrups?                                                                                                                                                                                                |                                                                                                      |                                                                                                                                                                                                                                  |
| 41 | 16.b.1 | Primary health center                                                                                                                                                                                                                                         | 1. Yes<br>2. No                                                                                      |                                                                                                                                                                                                                                  |
| 42 | 16.b.2 | Sub – centre                                                                                                                                                                                                                                                  | 1. Yes<br>2. No                                                                                      |                                                                                                                                                                                                                                  |
| 43 | 16.b.3 | Government hospital                                                                                                                                                                                                                                           | 1. Yes<br>2. No                                                                                      |                                                                                                                                                                                                                                  |

|    |        |                                                                                                                                           |                 |                                                                                                                               |
|----|--------|-------------------------------------------------------------------------------------------------------------------------------------------|-----------------|-------------------------------------------------------------------------------------------------------------------------------|
| 44 | 16.b.4 | Others                                                                                                                                    | 1. Yes<br>2. No | If no, skip to 16.c                                                                                                           |
| 45 | 16.b.5 | Others (Specify)                                                                                                                          |                 |                                                                                                                               |
| 46 | 16.c   | How many iron tablets/ syrups did you receive for your child in the past 6 months?<br>(Instruction: Please provide the number of tablets) |                 |                                                                                                                               |
| 47 | 17     | If you have not received/ taken the tablet, please mention why?                                                                           |                 |                                                                                                                               |
| 48 | 17.1   | No supply                                                                                                                                 | 1. Yes<br>2. No |                                                                                                                               |
| 49 | 17.2   | Not interested                                                                                                                            | 1. Yes<br>2. No |                                                                                                                               |
| 50 | 17.3   | Forgot                                                                                                                                    | 1. Yes<br>2. No |                                                                                                                               |
| 51 | 17.4   | No time                                                                                                                                   | 1. Yes<br>2. No |                                                                                                                               |
| 52 | 17.5   | Healthy food is enough                                                                                                                    | 1. Yes<br>2. No |                                                                                                                               |
| 53 | 17.6   | Side effects                                                                                                                              | 1. Yes<br>2. No |                                                                                                                               |
| 54 | 17.7   | Others                                                                                                                                    | 1. Yes<br>2. No |                                                                                                                               |
| 55 | 17.8   | Others (Specify)                                                                                                                          |                 |                                                                                                                               |
|    |        | <b>Section 6 - History of consumption of iron tablets</b>                                                                                 |                 |                                                                                                                               |
| 56 | 18.a   | Have/Had you given iron tablets regularly to your child in the past six months?                                                           | 1. Yes<br>2. No | 1. If 1.yes, move to Q.18.b and deactivate Q.19<br>2. If 2. No, move to Q. 18.b and activate Q.19<br><br>change on 23-11-2020 |



|    |        |                                                                                                                                                           |                                                                     |                                                                                                                                                   |
|----|--------|-----------------------------------------------------------------------------------------------------------------------------------------------------------|---------------------------------------------------------------------|---------------------------------------------------------------------------------------------------------------------------------------------------|
| 57 | 18.b   | What is the frequency of giving iron tablets to your child?                                                                                               | 1. Daily<br>2. Weekly<br>3. Monthly                                 | If 1. Daily skip to question 18.d<br>If 2. Weekly skip to Q18.c.1 and deactivate Q18.c.2<br>If 3. Monthly skip to Q 18.c.2 and deactivate Q18.c.1 |
| 58 | 15.b   | If Yes or Sometimes what is the frequency of giving Iron Tablets to your children?                                                                        | 1 - Daily<br>2 - Weekly<br>3 - Monthly                              | If daily, skip to Q.15 d<br>If 2 or 3 then goto question 15.c                                                                                     |
| 59 | 18.c.1 | How many days did your child consume iron tablets in a week?                                                                                              |                                                                     |                                                                                                                                                   |
| 60 | 18.c.2 | How many days did your child consume iron tablets in a month?                                                                                             |                                                                     |                                                                                                                                                   |
| 61 | 18.d   | How many tablets have you given to your child in past one month?<br>(Instruction: Please provide the number of tablets)                                   |                                                                     |                                                                                                                                                   |
| 62 | 18.e   | For how many months did you give iron tablets to your child?<br>(Instruction: History of IFA tablet consumption - count backwards from the current month) |                                                                     |                                                                                                                                                   |
| 63 | 18.f   | What is the time of the day when you give the tablets to your child?                                                                                      | 1. Before meal<br>2. Immediately after meal<br>99. Others (Specify) |                                                                                                                                                   |
| 64 | 18.f.1 | Others (Specify)                                                                                                                                          |                                                                     |                                                                                                                                                   |
| 65 | 18.g   | Did your child experience any side effects while taking the tablet?                                                                                       | 1. Yes<br>2. No                                                     | If 2. No, Skip to Section 7 -for iron syrup users.<br>If they are not using iron syrups skip to section 8.<br>If 1 goto question 18.h.1           |
| 66 | 18.h   | If your child experienced any side effects while taking the iron tablets, please list them.                                                               |                                                                     |                                                                                                                                                   |
| 67 | 18.h.1 | Constipation                                                                                                                                              | 1. Yes<br>2. No                                                     |                                                                                                                                                   |
| 68 | 18.h.2 | Diarrhea                                                                                                                                                  | 1. Yes<br>2. No                                                     |                                                                                                                                                   |

|    |        |                                                                                               |                 |  |
|----|--------|-----------------------------------------------------------------------------------------------|-----------------|--|
| 69 | 18.h.3 | Nausea/ vomiting                                                                              | 1. Yes<br>2. No |  |
| 70 | 18.h.4 | Pain in abdomen                                                                               | 1. Yes<br>2. No |  |
| 71 | 18.h.5 | Black stools                                                                                  | 1. Yes<br>2. No |  |
| 72 | 18.h.6 | Others                                                                                        | 1. Yes<br>2. No |  |
| 73 | 18.h.7 | Others (Specify)                                                                              |                 |  |
| 74 | 18.i   | What did you do after your child experienced the side-effects?                                |                 |  |
| 75 | 18.i.1 | Stopped giving tablets completely                                                             | 1. Yes<br>2. No |  |
| 76 | 18.i.2 | Stopped for few days and continued                                                            | 1. Yes<br>2. No |  |
| 77 | 18.i.3 | Changed doctor                                                                                | 1. Yes<br>2. No |  |
| 78 | 18.i.4 | Continued in spite of side effects                                                            | 1. Yes<br>2. No |  |
| 79 | 18.i.5 | Others                                                                                        | 1. Yes<br>2. No |  |
| 80 | 18.i.6 | Others (Specify)                                                                              |                 |  |
| 81 | 19     | If you are not giving iron tablets or not giving regularly to your child, please mention why? |                 |  |
| 82 | 19.1   | Forgot to give iron tablet                                                                    | 1. Yes<br>2. No |  |
| 83 | 19.2   | Side effects                                                                                  | 1. Yes<br>2. No |  |
| 84 | 19.3   | Not interested                                                                                | 1. Yes<br>2. No |  |

|    |        |                                                                                                                                                             |                                     |                                                                                                                                                 |
|----|--------|-------------------------------------------------------------------------------------------------------------------------------------------------------------|-------------------------------------|-------------------------------------------------------------------------------------------------------------------------------------------------|
| 85 | 19.4   | No time                                                                                                                                                     | 1. Yes<br>2. No                     |                                                                                                                                                 |
| 86 | 19.5   | Costly                                                                                                                                                      | 1. Yes<br>2. No                     |                                                                                                                                                 |
| 87 | 19.6   | Healthy food is enough                                                                                                                                      | 1. Yes<br>2. No                     |                                                                                                                                                 |
| 88 | 19.7   | Others                                                                                                                                                      | 1. Yes<br>2. No                     |                                                                                                                                                 |
| 89 | 19.8   | Others (Specify)                                                                                                                                            |                                     |                                                                                                                                                 |
|    |        | <b>Section 7: History of consumption of iron syrups</b>                                                                                                     |                                     |                                                                                                                                                 |
| 90 | 20.a   | Have/ Had you given iron syrups regularly to your child in the past six months?                                                                             | 1. Yes<br>2. No                     | 1. If 1.yes, move to Q.20.b and deactivate Q.21<br>2. If 2. No, move to Q. 20.b and activate Q.21<br><br>change on 23-11-2020                   |
| 91 | 20.b   | What is the frequency of giving iron syrups to your child?                                                                                                  | 1. Daily<br>2. Weekly<br>3. Monthly | If 1. Daily, skip to Q.20 d<br><br>If 2. Weekly skip to Q20.c.1 and deactivate Q20.c.2<br>If 3. Monthly skip to Q 20.c.2 and deactivate Q20.c.1 |
| 92 | 20.c.1 | How many days did your child consume iron syrup in a week?                                                                                                  |                                     |                                                                                                                                                 |
| 93 | 20.c.2 | How many days did your child consume iron syrup in a month?                                                                                                 |                                     |                                                                                                                                                 |
| 94 | 20.d   | How many syrup bottles have you given to your child in a month?<br>(Instruction: Please provide number)                                                     |                                     |                                                                                                                                                 |
| 95 | 20.e   | For how many months did you give iron syrup to your child?<br>(Instruction: History of IFA iron syrup consumption. Count backwards from the current month.) |                                     |                                                                                                                                                 |

|     |        |                                                                                                                                                                                                              |                                                                     |                                                         |
|-----|--------|--------------------------------------------------------------------------------------------------------------------------------------------------------------------------------------------------------------|---------------------------------------------------------------------|---------------------------------------------------------|
| 96  | 20.f   | What is the quantity of syrup given to the child (in ml)?<br>(Approximate quantity of syrup consumed to be understood from the bottle and the measuring cup/ spoon used. If spoon, 1tsp=5ml and 1 tbsp=10ml) |                                                                     |                                                         |
| 97  | 20.g   | What is the time of the day when you give the iron syrup to your child?                                                                                                                                      | 1. Before meal<br>2. Immediately after meal<br>99. Others (Specify) |                                                         |
| 98  | 20.g.1 | Others (Specify)                                                                                                                                                                                             |                                                                     |                                                         |
| 99  | 20.h   | Did your child experience any side effects while taking the syrup?                                                                                                                                           | 1. Yes<br>2. No                                                     | IF 2. no, SKIP TO Section 8<br>If 1 go to question 20.i |
| 100 | 20.i   | If your child experienced any side effects while taking the iron syrup, please list them                                                                                                                     |                                                                     |                                                         |
| 101 | 20.i.1 | Constipation                                                                                                                                                                                                 | 1. Yes<br>2. No                                                     |                                                         |
| 102 | 20.i.2 | Diarrhea                                                                                                                                                                                                     | 1. Yes<br>2. No                                                     |                                                         |
| 103 | 20.i.3 | Nausea/vomiting                                                                                                                                                                                              | 1. Yes<br>2. No                                                     |                                                         |
| 104 | 20.i.4 | Pain in abdomen                                                                                                                                                                                              | 1. Yes<br>2. No                                                     |                                                         |
| 105 | 20.i.5 | Black stools                                                                                                                                                                                                 | 1. Yes<br>2. No                                                     |                                                         |
| 106 | 20.i.6 | Others                                                                                                                                                                                                       | 1. Yes<br>2. No                                                     |                                                         |
| 107 | 20.i.7 | Others (Specify)                                                                                                                                                                                             |                                                                     |                                                         |
| 108 | 20.j   | What did you do after your child experienced the side-effects?                                                                                                                                               |                                                                     |                                                         |
| 109 | 20.j.1 | Stopped giving syrups completely                                                                                                                                                                             | 1. Yes<br>2. No                                                     |                                                         |
| 110 | 20.j.2 | Stopped for few days and continued                                                                                                                                                                           | 1. Yes<br>2. No                                                     |                                                         |
| 111 | 20.j.3 | Changed doctor                                                                                                                                                                                               | 1. Yes<br>2. No                                                     |                                                         |

|     |        |                                                                                                                                                                                        |                                                                                                |  |
|-----|--------|----------------------------------------------------------------------------------------------------------------------------------------------------------------------------------------|------------------------------------------------------------------------------------------------|--|
| 112 | 20.j.4 | Continued in spite of side effects                                                                                                                                                     | 1. Yes<br>2. No                                                                                |  |
| 113 | 20.j.5 | Others                                                                                                                                                                                 | 1. Yes<br>2. No                                                                                |  |
| 114 | 20.j.6 | Others (Specify)                                                                                                                                                                       |                                                                                                |  |
| 115 | 21     | If you are not giving iron syrups regularly to your child, please mention why?                                                                                                         |                                                                                                |  |
| 116 | 21.1   | Forgot to give iron syrup                                                                                                                                                              | 1. Yes<br>2. No                                                                                |  |
| 117 | 21.2   | Side effects                                                                                                                                                                           | 1. Yes<br>2. No                                                                                |  |
| 118 | 21.3   | Not interested                                                                                                                                                                         | 1. Yes<br>2. No                                                                                |  |
| 119 | 21.4   | No time                                                                                                                                                                                | 1. Yes<br>2. No                                                                                |  |
| 120 | 21.5   | Costly                                                                                                                                                                                 | 1. Yes<br>2. No                                                                                |  |
| 121 | 21.6   | Healthy food is enough                                                                                                                                                                 | 1. Yes<br>2. No                                                                                |  |
| 122 | 21.7   | Others                                                                                                                                                                                 | 1. Yes<br>2. No                                                                                |  |
| 123 | 21.8   | Others (Specify)                                                                                                                                                                       |                                                                                                |  |
|     |        | <b>Section 8 : Information on habitual intake of foods affecting iron absorption</b>                                                                                                   |                                                                                                |  |
| 124 | 22     | Does your child have the habit of taking tea or coffee along with meals?                                                                                                               | 1. Yes, always<br>2. Yes, Sometimes<br>3. No<br>4. Don't have the habit of taking tea/coffee   |  |
| 125 | 23     | Does your child have the habit of eating fruits such as guava/ orange/ papaya along with meals?<br>(Instruction: The response will pertain to the intake of any of these three fruits) | 1. Yes, always<br>2. Yes, sometimes<br>3. No<br>4. Don't have the habit of eating these fruits |  |

|     |      |                                                                                                                                                                                            |                                                                                                                                                                                   |                                                   |
|-----|------|--------------------------------------------------------------------------------------------------------------------------------------------------------------------------------------------|-----------------------------------------------------------------------------------------------------------------------------------------------------------------------------------|---------------------------------------------------|
| 126 | 24   | How frequently does your child eat non-vegetarian food?                                                                                                                                    | 1. No, he/she don't eat non-veg<br>2. Yes, once in a while<br>3. Yes, once in a month<br>4. Yes, weekly once<br>5. Yes, weekly 2-3 times<br>6. Yes, daily<br>7. Weekly, 4-6 times |                                                   |
| 127 | 25.a | Does your child consume fortified beverages in the last one month?<br>(Instruction: fortified beverages examples are horlicks, boost, complan)                                             | 1. Yes<br>2. No                                                                                                                                                                   | If 2 skip to Section 9<br>If 1 goto question 25.b |
| 128 | 25.b | Approximately, how frequently did you consume the fortified beverages                                                                                                                      | 1. Daily<br>2. Weekly 2-3 times<br>3. Weekly once<br>4. Monthly once<br>5. Weekly, 4-6 times                                                                                      |                                                   |
|     |      | <b>Section 9. Morbidity</b>                                                                                                                                                                |                                                                                                                                                                                   |                                                   |
| 129 | 26   | Did your child suffer from fever/ cold during the past two weeks?                                                                                                                          | 1. Yes<br>2. No                                                                                                                                                                   |                                                   |
| 130 | 27   | Did your child suffer from acute respiratory tract infection during the past two weeks?<br>(Instruction: Fever lasting for more than 3 days along with cough / cold/ breathing difficulty) | 1. Yes<br>2. No                                                                                                                                                                   |                                                   |
| 131 | 28   | Did your child have diarrhoea during the past two weeks?<br>(loose stools - 6 or more episodes/day, requiring medication)                                                                  | 1. Yes<br>2. No                                                                                                                                                                   |                                                   |
| 132 | 29   | Did your child suffer from vomiting/ nausea in the past two weeks?                                                                                                                         | 1. Yes<br>2. No                                                                                                                                                                   |                                                   |
| 133 | 30   | Did your child suffer from pneumonia/ bronchitis in the past two weeks?                                                                                                                    | 1. Yes<br>2. No                                                                                                                                                                   |                                                   |
|     |      | <b>Section 10. Height &amp; Weight</b>                                                                                                                                                     |                                                                                                                                                                                   |                                                   |
| 134 | 31   | Height (In cm)                                                                                                                                                                             |                                                                                                                                                                                   |                                                   |
| 135 | 32   | Weight (In Kg)                                                                                                                                                                             |                                                                                                                                                                                   |                                                   |

|      | Adolescent boys and girls |                                                                                                                      |                                                                                                                     |                                                                                 |
|------|---------------------------|----------------------------------------------------------------------------------------------------------------------|---------------------------------------------------------------------------------------------------------------------|---------------------------------------------------------------------------------|
| SINo | QN                        | Question                                                                                                             | Options                                                                                                             | Skip logic                                                                      |
|      |                           | <b>Basic information</b>                                                                                             |                                                                                                                     |                                                                                 |
| 1    | 1                         | Name of the mother                                                                                                   |                                                                                                                     |                                                                                 |
| 2    | 1.a                       | Others (Specify)                                                                                                     |                                                                                                                     |                                                                                 |
| 3    | 2                         | Name of the father                                                                                                   |                                                                                                                     |                                                                                 |
| 4    | 2.a                       | Others (Specify)                                                                                                     |                                                                                                                     |                                                                                 |
| 5    | 3                         | Currently studying in                                                                                                | 1. School<br>2. College<br>3. Not studying                                                                          | If 3. Not studying, deactivate Q4 and Q5                                        |
| 6    | 4                         | Name of school / college<br>(in which the participant is studying currently)                                         |                                                                                                                     |                                                                                 |
| 7    | 5                         | Type of school / college<br>(in which the participant is studying currently)                                         | 1. Government<br>2. Private<br>3. Aided<br>99. Others (Specify)                                                     |                                                                                 |
| 8    | 5.1                       | Others (Specify)                                                                                                     |                                                                                                                     |                                                                                 |
|      |                           | <b>Section 1: Knowledge on anemia</b>                                                                                |                                                                                                                     |                                                                                 |
| 9    | 6.a                       | Have you heard about anemia?<br>(Instruction: If the person is doubtful or not saying anything, opt for 'no answer') | 1. Yes<br>2. No<br>3. No answer                                                                                     | If 2. no or 77. no answer, skip to Section 2<br>If 1.yes then goto question 6.b |
| 10   | 6.b                       | Can you tell me the causes of anemia?                                                                                | 1. Inadequate food<br>2. Blood loss<br>3. Worm infestation<br>4. Heredity<br>77. Don't know<br>99. Others (Specify) |                                                                                 |

|    |       |                                                                                                                                                          |                                                                                                                                                                                                                                        |  |
|----|-------|----------------------------------------------------------------------------------------------------------------------------------------------------------|----------------------------------------------------------------------------------------------------------------------------------------------------------------------------------------------------------------------------------------|--|
| 11 | 6.b.1 | Others (Specify)                                                                                                                                         |                                                                                                                                                                                                                                        |  |
| 12 | 6.c   | Can you tell me how can we recognize someone with anemia?                                                                                                | 1. Low energy / weakness<br>2. Pallor / pale eyes, nails<br>3. Spoon shaped nails<br>4. Fall sick frequently<br>5. Blood test<br>77. Don't know<br>99. Others (Specify)                                                                |  |
| 13 | 6.c.1 | Others (Specify)                                                                                                                                         |                                                                                                                                                                                                                                        |  |
| 14 | 6.d   | How can anemia be prevented?                                                                                                                             | 1. Eat iron - rich foods<br>2. Eat vitamin – c rich foods during or right after meals<br>3. Take iron supplements if prescribed<br>4. Treat other causes of anemia (diseases and infections)<br>77. Don't know<br>99. Others (Specify) |  |
| 15 | 6.d.1 | Others (Specify)                                                                                                                                         |                                                                                                                                                                                                                                        |  |
|    |       | <b>Section 2: History of screening for anemia and treatment (Instruction: Less than 6 months count back ward from the month of survey till 6 months)</b> |                                                                                                                                                                                                                                        |  |



|    |       |                                                                                                                              |                                                                                                                                                                               |                                                                                                                                     |
|----|-------|------------------------------------------------------------------------------------------------------------------------------|-------------------------------------------------------------------------------------------------------------------------------------------------------------------------------|-------------------------------------------------------------------------------------------------------------------------------------|
| 16 | 7.a   | Have you checked hemoglobin in the past six months for knowing anemia status?<br>(Probe: Have you undergone any blood test)  | 1. Yes<br>2. No<br>77. Don't know                                                                                                                                             | if answer is 2.No OR 77.don't know, skip to Q 8a.<br><br>If 1. yes go to question 7.b<br><br>Change On 15-02-2021Beta Demo Feedback |
| 17 | 7.b   | From where did you get tested?<br>(In case if the Hb has been tested multiple times; the most recent one should be recorded) | 1. Primary health centre<br>2. Sub-centre<br>3. Government hospital<br>4. Private hospital<br>5. Private lab<br>99.Others (specify)                                           |                                                                                                                                     |
| 18 | 7.b.1 | Others (Specify)                                                                                                             |                                                                                                                                                                               |                                                                                                                                     |
| 19 | 7.c   | How do you want to report the hemoglobin level?                                                                              | 1. Record<br>2. Recall<br>77. Don't know                                                                                                                                      | if 77. Don't know skip to 8.a                                                                                                       |
| 20 | 7.d   | Hemoglobin level (value in g/dl)                                                                                             |                                                                                                                                                                               | If Hb >=12 (AG)If Hb >=13 for (AB) Skip to Section3<br>(No skip if the question filled on basis of recall)                          |
| 21 | 8.a   | Did you receive/buy iron tablets?<br>(in the past six months)                                                                | 1. Yes<br>2. No                                                                                                                                                               | If 2. no, skip to Q. 9<br>If Yes then goto question 8.b                                                                             |
| 22 | 8.b   | Please mention, from where did you receive?                                                                                  | 1. ASHA worker<br>2. ANM / Sub - Centre<br>3. Primary Health Center<br>4. Government Hospital<br>5. Private Doctor / Private Pharmacy<br>6. Anganwadi<br>99. Others (Specify) |                                                                                                                                     |
| 23 | 8.b.1 | Others (Specify)                                                                                                             |                                                                                                                                                                               |                                                                                                                                     |

|    |     |                                                                                                                                              |                                                                                                      |                                                                                                                                                                                                                                                                    |
|----|-----|----------------------------------------------------------------------------------------------------------------------------------------------|------------------------------------------------------------------------------------------------------|--------------------------------------------------------------------------------------------------------------------------------------------------------------------------------------------------------------------------------------------------------------------|
| 24 | 8.c | Did you consume the tablets/syrups received by you ?<br>(Instruction: Elicit info on habitual consumption/ attitude towards tablet or syrup) | 1. Tablet<br>2. Syrup<br>3. Both iron tablet and syrup<br>4. Didn't consume (either tablet or syrup) | If 1. tablet, 2. syrup, 3. both iron tablet and syrup skip to section 3. If 1. tablet MUST FILL SECTION 5<br>IF 2. Syrup MUST FILL SECTION 6<br>IF 3. both MUST FILL SECTION 5-6<br>IF 4. didn't consume continue to question no. 9 and deactivate section 5 and 6 |
| 25 | 9   | If you did not receive/ consume iron tablets /syrup, please mention why?                                                                     |                                                                                                      |                                                                                                                                                                                                                                                                    |
| 26 | 9.1 | Forget to take iron tablets                                                                                                                  | 1. Yes<br>2. No                                                                                      |                                                                                                                                                                                                                                                                    |
| 27 | 9.2 | Side effects                                                                                                                                 | 1. Yes<br>2. No                                                                                      |                                                                                                                                                                                                                                                                    |
| 28 | 9.3 | Not interested                                                                                                                               | 1. Yes<br>2. No                                                                                      |                                                                                                                                                                                                                                                                    |
| 29 | 9.4 | No time                                                                                                                                      | 1. Yes<br>2. No                                                                                      |                                                                                                                                                                                                                                                                    |
| 30 | 9.5 | Costly                                                                                                                                       | 1. Yes<br>2. No                                                                                      |                                                                                                                                                                                                                                                                    |
| 31 | 9.6 | Healthy food is enough                                                                                                                       | 1. Yes<br>2. No                                                                                      |                                                                                                                                                                                                                                                                    |
| 32 | 9.7 | Others                                                                                                                                       | 1. Yes<br>2. No                                                                                      |                                                                                                                                                                                                                                                                    |
| 33 | 9.8 | Others (Specify)                                                                                                                             |                                                                                                      |                                                                                                                                                                                                                                                                    |
|    |     | <b>Section 3: Current status of anemia</b>                                                                                                   |                                                                                                      |                                                                                                                                                                                                                                                                    |

|                                                                                                         |        |                                                                                                                                                                                                                          |                                                                                                      |                                                                                                                                                                |
|---------------------------------------------------------------------------------------------------------|--------|--------------------------------------------------------------------------------------------------------------------------------------------------------------------------------------------------------------------------|------------------------------------------------------------------------------------------------------|----------------------------------------------------------------------------------------------------------------------------------------------------------------|
| 34                                                                                                      | 10.a   | Are you currently taking iron tablets/syrups?                                                                                                                                                                            | 1. Tablet<br>2. Syrup<br>3. Both iron tablet and syrup<br>4. Didn't consume (either tablet or syrup) | If 1. tablet MUST FILL SECTION 5<br>IF 2. Syrup MUST FILL SECTION 6<br>IF 3. both MUST FILL SECTION 5-6<br>If 4, skip to section 4 and disable section 5 and 6 |
| 35                                                                                                      | 10.b   | Please provide detailed information on the iron tablets/syrups consumed by you (Please show a wrapper for reference) (Instruction: Record this information from the iron tablet blisters available with the participant) |                                                                                                      |                                                                                                                                                                |
| 36                                                                                                      | 10.b.1 | Brand                                                                                                                                                                                                                    |                                                                                                      |                                                                                                                                                                |
| 37                                                                                                      | 10.b.2 | Company                                                                                                                                                                                                                  |                                                                                                      |                                                                                                                                                                |
| 38                                                                                                      | 10.b.3 | Dose per day                                                                                                                                                                                                             |                                                                                                      |                                                                                                                                                                |
| 39                                                                                                      | 10.b.4 | Take a photo                                                                                                                                                                                                             |                                                                                                      |                                                                                                                                                                |
| <b>Section 4: Information on prophylactic government programs in the community for anemia reduction</b> |        |                                                                                                                                                                                                                          |                                                                                                      |                                                                                                                                                                |
| 40                                                                                                      | 11.a   | Did you receive de-worming tablets in the past one year from the date of interview?<br>(For AB - School; For AG - School / AWC)                                                                                          | 1. Yes<br>2. No<br>3. Not applicable<br>4. Don't know / no answer                                    | If 2.no, 3. not applicable, 77. don't know , skip to Q. 12                                                                                                     |
| 41                                                                                                      | 11.b   | How many times did you receive a de-worming tablet in the past year?                                                                                                                                                     | 1. Once<br>2. Twice<br>3. Not sure                                                                   |                                                                                                                                                                |
| 42                                                                                                      | 12.a   | Did you receive iron tablets in the past one year?<br>(Instruction: For boy's School; For girls School / AWC)                                                                                                            | 1. Yes<br>2. No<br>3. Not applicable                                                                 | If 2. No skip to Q. 13 And deactivate qn.12.b<br><br>If 1.Yes Enable 12.b and deactivate Q.13<br><br>If 3.Not Applicable De-Activate Qn12.b And 13             |

|                                                          |      |                                                                                                      |                                            |                                                                                                   |
|----------------------------------------------------------|------|------------------------------------------------------------------------------------------------------|--------------------------------------------|---------------------------------------------------------------------------------------------------|
|                                                          |      |                                                                                                      |                                            | Priority 2 changes Form Wise.                                                                     |
| 43                                                       | 12.b | Please mention the regularity of iron tablets received by you                                        | 1. Weekly<br>2. Weekly twice<br>3. Monthly |                                                                                                   |
| 44                                                       | 13   | If you have not received/ taken the tablet, please mention why?                                      |                                            |                                                                                                   |
| 45                                                       | 13.1 | No supply                                                                                            | 1. Yes<br>2. No                            |                                                                                                   |
| 46                                                       | 13.2 | Not interested                                                                                       | 1. Yes<br>2. No                            |                                                                                                   |
| 47                                                       | 13.3 | Forgot                                                                                               | 1. Yes<br>2. No                            |                                                                                                   |
| 48                                                       | 13.4 | No time                                                                                              | 1. Yes<br>2. No                            |                                                                                                   |
| 49                                                       | 13.5 | Healthy food is enough                                                                               | 1. Yes<br>2. No                            |                                                                                                   |
| 50                                                       | 13.6 | Side effects                                                                                         | 1. Yes<br>2. No                            |                                                                                                   |
| 51                                                       | 13.7 | Others                                                                                               | 1. Yes<br>2. No                            |                                                                                                   |
| 52                                                       | 13.8 | Others (Specify)                                                                                     |                                            |                                                                                                   |
| <b>Section 5: History of consumption of iron tablets</b> |      |                                                                                                      |                                            |                                                                                                   |
| 53                                                       | 14.a | Do/ Did you regularly consume iron tablet?<br>(Instruction: To elicit regularity of IFA consumption) | 1. Yes<br>2. No                            | 1. If 1.yes, move to Q.14.b and deactivate Q.15<br>2. If 2. No, move to Q. 14.b and activate Q.15 |

|    |        |                                                                                                                                                   |                                                                    |                                                                                                                                                              |
|----|--------|---------------------------------------------------------------------------------------------------------------------------------------------------|--------------------------------------------------------------------|--------------------------------------------------------------------------------------------------------------------------------------------------------------|
| 54 | 14.b   | What is the frequency of consuming iron tablets?                                                                                                  | 1. Daily<br>2. Weekly<br>3. Monthly                                | If 1.daily, skip to Q.14 d<br>If 2. weekly skip to Q14.c.1 and disable Q14.c.2<br>If 3. Monthly skip to Q14.c.2 and disable Q14.c.1                          |
| 55 | 14.c.1 | How many days did you consume the iron tablets in a week?                                                                                         |                                                                    |                                                                                                                                                              |
| 56 | 14.c.2 | How many days did you consume the iron tablets in a month?                                                                                        |                                                                    |                                                                                                                                                              |
| 57 | 14.d   | What is the time of the day when you take iron tablets?                                                                                           | 1. Before meal<br>2. Immediately after meal<br>99.Others (Specify) |                                                                                                                                                              |
| 58 | 14.d.1 | Others (Specify)                                                                                                                                  |                                                                    |                                                                                                                                                              |
| 59 | 14.e   | How many tablets have you consumed in a month?<br>(Instruction: Please provide number of tablets)                                                 |                                                                    |                                                                                                                                                              |
| 60 | 14.f   | For how many months did you consume the iron tablets?<br>(Instruction: History of IFA tablet consumption. Count backwards from the current month) |                                                                    |                                                                                                                                                              |
| 61 | 14.g   | Have you experienced any side effects while consuming the iron tablet?                                                                            | 1. Yes<br>2. No                                                    | If 2. no, skip to Section 7.<br><br>If the participant is using syrups ( in question 8.a, if options 2. syrup or 3. both tablet and syrup) skip to Section 6 |
| 62 | 14.h   | If you experienced any side effects while taking the iron tablets please choose all the side effects that you experienced                         |                                                                    |                                                                                                                                                              |
| 63 | 14.h.1 | Constipation                                                                                                                                      | 1. Yes<br>2. No                                                    |                                                                                                                                                              |
| 64 | 14.h.2 | Diarrhea                                                                                                                                          | 1. Yes<br>2. No                                                    |                                                                                                                                                              |
| 65 | 14.h.3 | Nausea, vomiting                                                                                                                                  | 1. Yes                                                             |                                                                                                                                                              |

|    |        |                                                                                       |                 |  |
|----|--------|---------------------------------------------------------------------------------------|-----------------|--|
|    |        |                                                                                       | 2. No           |  |
| 66 | 14.h.4 | Pain in abdomen                                                                       | 1. Yes<br>2. No |  |
| 67 | 14.h.5 | Black stools                                                                          | 1. Yes<br>2. No |  |
| 68 | 14.h.6 | Others                                                                                | 1. Yes<br>2. No |  |
| 69 | 14.h.7 | Others (Specify)                                                                      |                 |  |
| 70 | 14.i   | What did you do after experiencing the side-effects?                                  |                 |  |
| 71 | 14.i.1 | Stopped taking tablets completely                                                     | 1. Yes<br>2. No |  |
| 72 | 14.i.2 | Stopped for few days and continued                                                    | 1. Yes<br>2. No |  |
| 73 | 14.i.3 | Changed doctor                                                                        | 1. Yes<br>2. No |  |
| 74 | 14.i.4 | Continued in spite of side effects                                                    | 1. Yes<br>2. No |  |
| 75 | 14.i.5 | Others                                                                                | 1. Yes<br>2. No |  |
| 76 | 14.i.6 | Others (Specify)                                                                      |                 |  |
| 77 | 15     | If you are not consuming iron tablets or not consuming regularly, please mention why? |                 |  |
| 78 | 15.1   | Forgot to take iron tablets                                                           | 1. Yes<br>2. No |  |
| 79 | 15.2   | Side effects                                                                          | 1. Yes<br>2. No |  |
| 80 | 15.3   | Not interested                                                                        | 1. Yes<br>2. No |  |
| 81 | 15.4   | No time                                                                               | 1. Yes<br>2. No |  |
| 82 | 15.5   | Costly                                                                                | 1. Yes<br>2. No |  |

|    |        |                                                                                                     |                                                                    |                                                                                                                                     |
|----|--------|-----------------------------------------------------------------------------------------------------|--------------------------------------------------------------------|-------------------------------------------------------------------------------------------------------------------------------------|
| 83 | 15.6   | Healthy food is enough                                                                              | 1. Yes<br>2. No                                                    |                                                                                                                                     |
| 84 | 15.7   | Others                                                                                              | 1. Yes<br>2. No                                                    |                                                                                                                                     |
| 85 | 15.8   | Others (Specify)                                                                                    |                                                                    |                                                                                                                                     |
|    |        | <b>Section 6: History of consuming iron syrups</b>                                                  |                                                                    |                                                                                                                                     |
| 86 | 16.a   | Do/ Did you regularly consume iron syrup?<br>(Instruction: To elicit regularity of IFA consumption) | 1.Yes<br>2.No                                                      | 1. If 1.yes, move to Q.16.b and deactivate Q.17<br><br>2. If 2. No, move to Q. 16.b and activate Q.17<br><br>Change on 23-11-2020   |
| 87 | 16.b   | What is the frequency of consuming iron syrups?                                                     | 1.Daily<br>2.Weekly<br>3.Monthly                                   | If 1.Daily, skip to Q.16 d<br>If 2. weekly skip to Q16.c.1 and disable Q16.c.2<br>If 3. monthly skip to Q16.c.2 and disable Q16.c.1 |
| 88 | 16.c.1 | How many days did you consume the iron syrups in a week?                                            |                                                                    |                                                                                                                                     |
| 89 | 16.c.2 | How many days did you consume the iron syrups in a month?                                           |                                                                    |                                                                                                                                     |
| 90 | 16.d   | What is the time of the day when you take the iron syrup?                                           | 1. Before meal<br>2. Immediately after meal<br>99.Others (Specify) |                                                                                                                                     |
| 91 | 16.d.1 | Others (Specify)                                                                                    |                                                                    |                                                                                                                                     |
| 92 | 16.e   | For how many months you have consumed iron syrup?                                                   |                                                                    |                                                                                                                                     |
| 93 | 16.f   | In a month, how many bottles of iron syrup do you consume?                                          |                                                                    |                                                                                                                                     |

|     |        |                                                                                                                                                                                                                                 |                 |                                                            |
|-----|--------|---------------------------------------------------------------------------------------------------------------------------------------------------------------------------------------------------------------------------------|-----------------|------------------------------------------------------------|
| 94  | 16.g   | What is the quantity of syrup consumed by you (in ml)?<br>(Approximate quantity of syrup consumed in the past week to be understood from the bottle and the measuring cup/spoon used. If spoon, 1 tsp= 5 ml and 1 tbsp.= 10 ml) |                 |                                                            |
| 95  | 16.h   | Have you experienced any side effects while consuming the iron syrup?                                                                                                                                                           | 1. Yes<br>2. No | If 2. no skip to Section 7<br>If 1. yes goto question 16.i |
| 96  | 16.i   | If you experienced any side effects while taking the iron syrups please choose all the side effects that you experienced                                                                                                        |                 |                                                            |
| 97  | 16.i.1 | Constipation                                                                                                                                                                                                                    | 1. Yes<br>2. No |                                                            |
| 98  | 16.i.2 | Diarrhea                                                                                                                                                                                                                        | 1. Yes<br>2. No |                                                            |
| 99  | 16.i.3 | Nausea, vomiting                                                                                                                                                                                                                | 1. Yes<br>2. No |                                                            |
| 100 | 16.i.4 | Pain in abdomen                                                                                                                                                                                                                 | 1. Yes<br>2. No |                                                            |
| 101 | 16.i.5 | Black stools                                                                                                                                                                                                                    | 1. Yes<br>2. No |                                                            |
| 102 | 16.i.6 | Others                                                                                                                                                                                                                          | 1. Yes<br>2. No |                                                            |
| 103 | 16.i.7 | Others (Specify)                                                                                                                                                                                                                |                 |                                                            |
| 104 | 16.j   | What did you do after experiencing the side-effects?                                                                                                                                                                            |                 |                                                            |
| 105 | 16.j.1 | Stopped taking syrups completely                                                                                                                                                                                                | 1. Yes<br>2. No |                                                            |
| 106 | 16.j.2 | Stopped for few days and continued                                                                                                                                                                                              | 1. Yes<br>2. No |                                                            |
| 107 | 16.j.3 | Changed doctor                                                                                                                                                                                                                  | 1. Yes<br>2. No |                                                            |
| 108 | 16.j.4 | Continued in-spite of side effects                                                                                                                                                                                              | 1. Yes<br>2. No |                                                            |



|     |        |                                                                                                                                                                               |                                                                                                |  |
|-----|--------|-------------------------------------------------------------------------------------------------------------------------------------------------------------------------------|------------------------------------------------------------------------------------------------|--|
| 109 | 16.j.5 | Others                                                                                                                                                                        | 1. Yes<br>2. No                                                                                |  |
| 110 | 16.j.6 | Others (Specify)                                                                                                                                                              |                                                                                                |  |
| 111 | 17     | If you are not consuming iron syrups or not consuming regularly, please mention why?                                                                                          |                                                                                                |  |
| 112 | 17.1   | Forgot to take iron syrup                                                                                                                                                     | 1. Yes<br>2. No                                                                                |  |
| 113 | 17.2   | Side effects                                                                                                                                                                  | 1. Yes<br>2. No                                                                                |  |
| 114 | 17.3   | Not interested                                                                                                                                                                | 1. Yes<br>2. No                                                                                |  |
| 115 | 17.4   | No time                                                                                                                                                                       | 1. Yes<br>2. No                                                                                |  |
| 116 | 17.5   | Costly                                                                                                                                                                        | 1. Yes<br>2. No                                                                                |  |
| 117 | 17.6   | Healthy food is enough                                                                                                                                                        | 1. Yes<br>2. No                                                                                |  |
| 118 | 17.7   | Others                                                                                                                                                                        | 1. Yes<br>2. No                                                                                |  |
| 119 | 17.8   | Others (Specify)                                                                                                                                                              |                                                                                                |  |
|     |        | <b>Section 7: Information on habitual intake of foods affecting iron absorption</b>                                                                                           |                                                                                                |  |
| 120 | 18     | Do you have the habit of taking tea or coffee along with meals?                                                                                                               | 1. Yes, always<br>2. Yes, sometimes<br>3. No<br>4. Don't have the habit of taking tea/coffee   |  |
| 121 | 19     | Do you have the habit of eating fruits such as guava/ orange/ papaya along with meals?<br>(Instruction: The response will pertain to the intake of any of these three fruits) | 1. Yes, always<br>2. Yes, sometimes<br>2. No<br>3. Don't have the habit of eating these fruits |  |

|                                     |      |                                                                                                                                                                       |                                                                                                                                                                              |                                                              |
|-------------------------------------|------|-----------------------------------------------------------------------------------------------------------------------------------------------------------------------|------------------------------------------------------------------------------------------------------------------------------------------------------------------------------|--------------------------------------------------------------|
| 122                                 | 20   | How frequently do you eat non-vegetarian food?                                                                                                                        | 1. No, I don't eat non-veg<br>2. Yes, once in a while<br>3. Yes, once in a month<br>4. Yes, weekly once<br>5. Yes, weekly 2-3 times<br>6. Yes, daily<br>7. Weekly, 4-6 times |                                                              |
| 123                                 | 21.a | Did you consume fortified beverages in the last one month?<br>(Instruction: fortified beverages examples are horlicks, boost, complan)                                | 1. Yes<br>2. No                                                                                                                                                              | If 2. no, skip to Section 8<br>If 1. yes goto question 21.b  |
| 124                                 | 21.b | Approximately, how frequently do you consume the fortified beverages                                                                                                  | 1. Daily<br>2. Weekly 2-3 times<br>3. Weekly once<br>4. Monthly once<br>5. Weekly, 4-6 times                                                                                 |                                                              |
| <b>Section 8: Morbidity</b>         |      |                                                                                                                                                                       |                                                                                                                                                                              |                                                              |
| 125                                 | 22   | Did you suffer from fever/cold during the past two weeks?                                                                                                             | 1. Yes<br>2. No                                                                                                                                                              |                                                              |
| 126                                 | 23   | Did you suffer from acute respiratory tract infection during the past two weeks?<br>(Instruction: Fever lasting for more than 3 days along with breathing difficulty) | 1. Yes<br>2. No                                                                                                                                                              |                                                              |
| 127                                 | 24   | Did you have diarrhea during the past two weeks?<br>(loose stools - 6 or more episodes/day, requiring medication)                                                     | 1. Yes<br>2. No                                                                                                                                                              |                                                              |
| 128                                 | 25   | Did you suffer from vomiting/ nausea in the past two weeks?                                                                                                           | 1. Yes<br>2. No                                                                                                                                                              |                                                              |
| 129                                 | 26   | Did you suffer from pneumonia/ bronchitis in the past two weeks                                                                                                       | 1. Yes<br>2. No                                                                                                                                                              |                                                              |
| <b>Section 9: Menstrual history</b> |      |                                                                                                                                                                       |                                                                                                                                                                              |                                                              |
| 130                                 | 27.a | Whether attained menarche                                                                                                                                             | 1. Yes<br>2. No                                                                                                                                                              | If 2.no, skip to Q. 28<br>If 1.Yes, then go to question 27.b |

|     |      |                                        |                                                 |  |
|-----|------|----------------------------------------|-------------------------------------------------|--|
| 131 | 27.b | Age at menarche (In complete years)    |                                                 |  |
| 132 | 27.c | Regularity of menstrual cycle          | 1. Regular<br>2. Irregular<br>3. Heavy bleeding |  |
|     |      | <b>Section 10: Height &amp; Weight</b> |                                                 |  |
| 133 | 28   | Height (In cms)                        |                                                 |  |
| 134 | 29   | Weight (In kgs)                        |                                                 |  |

## Currently pregnant women (Second trimester onwards)

| SINo | QN    | Question                                                                                                           | Options                                                                                                                                                                                                                                | Skiplogic                                                                       |
|------|-------|--------------------------------------------------------------------------------------------------------------------|----------------------------------------------------------------------------------------------------------------------------------------------------------------------------------------------------------------------------------------|---------------------------------------------------------------------------------|
|      |       | <b>Section:1 Knowledge on anemia</b>                                                                               |                                                                                                                                                                                                                                        |                                                                                 |
| 1    | 1.a   | Have you heard about anemia?<br>(Instruction: If the person is doubtful or not saying anything, opt for no answer) | 1. Yes<br>2. No<br>3. No answer                                                                                                                                                                                                        | If 2. no or 77. no answer, skip to Section 2<br>If 1.yes then goto question 6.b |
| 2    | 1.b   | Can you tell me the causes of anemia?                                                                              | 1. Inadequate food<br>2. Blood loss<br>3. Worm infestation<br>4. Heredity<br>77. Don't know<br>99. Others (Specify)                                                                                                                    |                                                                                 |
| 3    | 1.b.1 | Others (Specify)                                                                                                   |                                                                                                                                                                                                                                        |                                                                                 |
| 4    | 1.c   | Can you tell me how can we recognize someone with anemia?                                                          | 1. Low energy / weakness<br>2. Pallor / pale eyes, nails<br>3. Spoon shaped nails<br>4. Fall sick frequently<br>5. Blood test<br>77. Don't know<br>99. Others (Specify)                                                                |                                                                                 |
| 5    | 1.c.1 | Others (Specify)                                                                                                   |                                                                                                                                                                                                                                        |                                                                                 |
| 6    | 1.d   | How can anemia be prevented?                                                                                       | 1. Eat iron - rich foods<br>2. Eat vitamin – c rich foods during or right after meals<br>3. Take iron supplements if prescribed<br>4. Treat other causes of anemia (diseases and infections)<br>77. Don't know<br>99. Others (Specify) |                                                                                 |
| 7    | 1.d.1 | Others (Specify)                                                                                                   |                                                                                                                                                                                                                                        |                                                                                 |
|      |       | <b>Section: 2. Pregnancy related information</b>                                                                   |                                                                                                                                                                                                                                        |                                                                                 |

|    |     |                                                                                                                    |                                                                                                                                                |                                                                                                                            |
|----|-----|--------------------------------------------------------------------------------------------------------------------|------------------------------------------------------------------------------------------------------------------------------------------------|----------------------------------------------------------------------------------------------------------------------------|
| 8  | 2   | Parity<br>(Instruction: Parity refers to the number of births that a woman has had after 20 weeks of gestation)    |                                                                                                                                                |                                                                                                                            |
| 9  | 3a  | Do you know when was your last menstrual periods (LMP)<br>(Instruction: To be entered in dd/mm/yy format if known) | 1. Yes<br>2. No                                                                                                                                | If no, then skip to Q.4. If Yes, then go to 3.b                                                                            |
| 10 | 3b  | When was your LMP?<br>(Instruction: To be entered in dd/mm/yy format if known)                                     |                                                                                                                                                |                                                                                                                            |
| 11 | 4   | If exact LMP is not known, approximate month of pregnancy                                                          |                                                                                                                                                |                                                                                                                            |
| 12 | 5.a | Do you have a pregnancy card?<br>(Instruction: Pregnancy card refers to the ANC / MCP card from hospital)          | 1. Yes<br>2. No                                                                                                                                | If 1. Yes and 2. NO go to question 5.b                                                                                     |
| 13 | 5.b | Please mention the number of ANC visits completed till now?                                                        |                                                                                                                                                | If the value entered is 0, then SKIP to Q.8 and De-activate Q.9.a<br>If the value entered is other 0 then deactivate Q.9.b |
| 14 | 6   | Where do you go for ANC ?                                                                                          | 1. Government hospital<br>2. Private Hospital<br>3. Sometimes Govt. Sometimes Pvt<br>99. Others (Specify)                                      | I                                                                                                                          |
| 15 | 6.a | Others (Specify)                                                                                                   |                                                                                                                                                |                                                                                                                            |
| 16 | 7   | Why do you prefer the above mentioned health facility?                                                             | 1 .Near to home<br>2. Easy Transportation<br>3. Trust<br>4. Better treatment<br>5. Money<br>6. Availability of doctors<br>99. Others (Specify) |                                                                                                                            |
| 17 | 7.a | Others (Specify)                                                                                                   |                                                                                                                                                |                                                                                                                            |

|    |        |                                                                                                               |                                                                                                                                                                                                                             |                                                                          |
|----|--------|---------------------------------------------------------------------------------------------------------------|-----------------------------------------------------------------------------------------------------------------------------------------------------------------------------------------------------------------------------|--------------------------------------------------------------------------|
| 18 | 8      | Who decides the place of ANC and delivery for you?                                                            | 1. Husband<br>2. Mother-In-Law<br>3. Myself<br>4. My parents<br>99. Others (Specify)                                                                                                                                        |                                                                          |
| 19 | 8.a    | Others (Specify)                                                                                              |                                                                                                                                                                                                                             |                                                                          |
| 20 | 9.a    | During the current pregnancy period, when was your first ANC visit?<br>(Please record in months of pregnancy) |                                                                                                                                                                                                                             |                                                                          |
| 21 | 9.b    | If you have not undergone any ANC check-ups, please mention why?                                              | 1. Financial issues<br>2. Long distance and transportation problems<br>3. Lack of awareness<br>4. Family refusal<br>5. Pregnancy perceived as a normal health condition<br>6. Religion/caste issues<br>99. Others (Specify) |                                                                          |
| 22 | 9.b.1  | Others (Specify)                                                                                              |                                                                                                                                                                                                                             |                                                                          |
| 23 | 10.a   | Do you have any complications related to the current pregnancy?                                               | 1. Yes<br>2. No<br>77. Don't know                                                                                                                                                                                           | If 2.No and<br>3.Don't know skip to Q 11<br>If 1.Yes go to 10.b question |
| 24 | 10.b   | If you have any complications related to the current pregnancy, please mention the nature of complications    |                                                                                                                                                                                                                             |                                                                          |
| 25 | 10.b.1 | Gestational diabetes                                                                                          | 1. Yes<br>2. No                                                                                                                                                                                                             |                                                                          |
| 26 | 10.b.2 | Hyperemesis                                                                                                   | 1. Yes<br>2. No                                                                                                                                                                                                             |                                                                          |
| 27 | 10.b.3 | Intra-uterine growth retardation                                                                              | 1. Yes<br>2. No                                                                                                                                                                                                             |                                                                          |
| 28 | 10.b.4 | Pregnancy induced hypertension                                                                                | 1. Yes<br>2. No                                                                                                                                                                                                             |                                                                          |
| 29 | 10.b.5 | Severe anemia                                                                                                 | 1. Yes                                                                                                                                                                                                                      |                                                                          |

|    |        |                                                                                                                         |                                                                                |                                                                                                                     |
|----|--------|-------------------------------------------------------------------------------------------------------------------------|--------------------------------------------------------------------------------|---------------------------------------------------------------------------------------------------------------------|
|    |        |                                                                                                                         | 2. No                                                                          |                                                                                                                     |
| 30 | 10.b.6 | Oligo or polyhydramnios                                                                                                 | 1. Yes<br>2. No                                                                |                                                                                                                     |
| 31 | 10.b.7 | Abnormal placental position/<br>cervical incompetence                                                                   | 1. Yes<br>2. No                                                                |                                                                                                                     |
| 32 | 10.b.8 | Others                                                                                                                  | 1. Yes<br>2. No                                                                |                                                                                                                     |
| 33 | 10.b.9 | Others (Specify)                                                                                                        |                                                                                |                                                                                                                     |
| 34 | 11     | Where are you planning your<br>delivery?                                                                                | 1. Home<br>2. Government Hospital<br>3. Private Hospital<br>4. Not Yet Planned |                                                                                                                     |
|    |        | <b>Section: 3. Activities by ASHA</b>                                                                                   |                                                                                |                                                                                                                     |
| 35 | 12     | Number of visits by ASHA during<br>current pregnancy?                                                                   | 1. One<br>2. Two<br>3. Three or more<br>4. No Visit                            | If the answer is 4.<br>no visit, skip to<br>section IV<br>If 1.one, 2.two or<br>3. three, then go<br>to question 13 |
| 36 | 13     | ANC activities,(Please list the<br>activities carried out by ASHA )                                                     |                                                                                |                                                                                                                     |
| 37 | 13.1   | Advice for mother                                                                                                       | 1. Yes<br>2. No                                                                |                                                                                                                     |
| 38 | 13.2   | Follow ups for monthly ANC<br>Checkups                                                                                  | 1. Yes<br>2. No                                                                |                                                                                                                     |
| 39 | 13.3   | Supplied IFA to mother                                                                                                  | 1. Yes<br>2. No                                                                |                                                                                                                     |
| 40 | 13.4   | No advice given                                                                                                         | 1. Yes<br>2. No                                                                |                                                                                                                     |
|    |        | <b>Section: 4. History of screening<br/>anemia during current<br/>pregnancy</b>                                         |                                                                                |                                                                                                                     |
| 41 | 14.a   | Have you got your blood tested<br>for hemoglobin during current<br>pregnancy?<br>(Probe: Check Hb / done blood<br>test) | 1. Yes<br>2. No                                                                | If the answer is<br>2.no, skip to Q.15<br>a<br>If 1.Yes than go to<br>question 14.b                                 |

|    |        |                                                                                                                              |                                                                                                                                                                               |                                               |
|----|--------|------------------------------------------------------------------------------------------------------------------------------|-------------------------------------------------------------------------------------------------------------------------------------------------------------------------------|-----------------------------------------------|
| 42 | 14.b   | From where did you get tested?<br>(In case if the Hb has been tested multiple times, the most recent one should be recorded) | 1. Primary health centre<br>2. Sub-centre<br>3. Government hospital<br>4. Private hospital<br>5. Private lab<br>99.Others (specify)                                           |                                               |
| 43 | 14.b.1 | Others (Specify)                                                                                                             |                                                                                                                                                                               |                                               |
| 44 | 14.c   | How do you want to report the hemoglobin level?                                                                              | 1. Record<br>2. Recall<br>77. Don't know                                                                                                                                      | If 77. don't know, skip to question 15.a      |
| 45 | 14.d   | Haemoglobin level (value in g/dl)                                                                                            |                                                                                                                                                                               |                                               |
| 46 | 15.a   | Did you receive/ buy iron tablets/ iron syrups?<br>(in the past six months)                                                  | 1. Yes<br>2. No                                                                                                                                                               | If 2.no, skip to Q16<br>If 1. yes go to Q15.b |
| 47 | 15.b   | Please mention, from where did you receive?                                                                                  | 1. ASHA worker<br>2. ANM / Sub - Centre<br>3. Primary Health Center<br>4. Government Hospital<br>5. Private Doctor / Private Pharmacy<br>6. Anganwadi<br>99. Others (Specify) |                                               |
| 48 | 15.b.1 | Others (Specify)                                                                                                             |                                                                                                                                                                               |                                               |



|    |        |                                                                                                                                               |                                                                                                              |                                                                                                                                                                                                                                                                                                                                                                                                               |
|----|--------|-----------------------------------------------------------------------------------------------------------------------------------------------|--------------------------------------------------------------------------------------------------------------|---------------------------------------------------------------------------------------------------------------------------------------------------------------------------------------------------------------------------------------------------------------------------------------------------------------------------------------------------------------------------------------------------------------|
| 49 | 15.c   | Did you consume the tablets/syrups that you received?<br>(Instruction: Elicit info on habitual consumption/ attitude towards tablet or syrup) | 1. Tablet<br>2. Syrup<br>3. Both iron tablet and syrup<br>4. Didn't consume (either tablet or syrup)         | If 1. tablet or 2. syrup or 3. both go to Q.15.d<br>If 4. didn't consume both need not fill section V and VI and skip to Q16.<br>If 1. Tablet must fill section V and need not fill section VI<br>If 2. syrup must fill section VI and need not fill section V<br>If 3. both must fill both sections V and VI<br>If 1, 2, 3 is selected, then deactivate the Q.16<br>If 4 is selected, then activate the Q.16 |
| 50 | 15.d   | Upload photo                                                                                                                                  |                                                                                                              |                                                                                                                                                                                                                                                                                                                                                                                                               |
| 51 | 15.e   | From which month of pregnancy did you start consuming iron tablets/syrups?                                                                    | 1. 1 -3 months<br>2. 4th month<br>3. 5th month<br>4. 6th month<br>5. >6th month                              |                                                                                                                                                                                                                                                                                                                                                                                                               |
| 52 | 15.f   | Are you willing to consume the iron tablets supplied by NIN for a period of three months?                                                     | 1. Yes<br>2. No, I would like to continue with the current medication<br>3. No answer<br>99.Others (Specify) | Enable this question only if the participant had answered 1. Tablet, 2. Syrup or 3. Both tablet and syrup to question 15.c                                                                                                                                                                                                                                                                                    |
| 53 | 15.f.1 | Others (Specify)                                                                                                                              |                                                                                                              |                                                                                                                                                                                                                                                                                                                                                                                                               |
| 54 | 16.a   | If you did not take/consume iron tablets /syrup, please mention why?                                                                          |                                                                                                              |                                                                                                                                                                                                                                                                                                                                                                                                               |

|    |          |                                                                                                                  |                                    |                                                                                                       |
|----|----------|------------------------------------------------------------------------------------------------------------------|------------------------------------|-------------------------------------------------------------------------------------------------------|
| 55 | 16.a.1   | Forgot to take iron tablets                                                                                      | 1. Yes<br>2. No                    |                                                                                                       |
| 56 | 16.a.2   | Side effects                                                                                                     | 1. Yes<br>2. No                    |                                                                                                       |
| 57 | 16.a.3   | Not interested                                                                                                   | 1. Yes<br>2. No                    |                                                                                                       |
| 58 | 16.a.4   | No time                                                                                                          | 1. Yes<br>2. No                    |                                                                                                       |
| 59 | 16.a.5   | Costly                                                                                                           | 1. Yes<br>2. No                    |                                                                                                       |
| 60 | 16.a.6   | Healthy food is enough                                                                                           | 1. Yes<br>2. No                    |                                                                                                       |
| 61 | 16.a.7   | Others                                                                                                           | 1. Yes<br>2. No                    |                                                                                                       |
| 62 | 16.a.7.1 | Others (Specify)                                                                                                 |                                    |                                                                                                       |
| 63 | 17.a     | Did you receive de-worming tablets during this pregnancy?<br>(Instruction: Use visual clue-tablets)              | 1. Yes<br>2. No<br>77. Don't know  | If 2.no or 3.don't know skip to section V, else continue with next question                           |
| 64 | 17.b     | If you have received deworming tablets during pregnancy, please mention how many times have you received so far? | 1. Once<br>2. Twice<br>3. Not sure |                                                                                                       |
|    |          | <b>Section 5. History of consumption of iron tablets</b>                                                         |                                    |                                                                                                       |
| 65 | 18.a     | Do you regularly consume iron tablets?<br>(Instruction:- To elicit regularity of IFA consumption)                | 1. Yes<br>2. No                    | 1. If 1.yes, move to Q.18.b and deactivate Q.19<br><br>2. If 2. No, move to Q. 18.b and activate Q.19 |

|    |          |                                                                    |                                                                                    |                                                                                           |
|----|----------|--------------------------------------------------------------------|------------------------------------------------------------------------------------|-------------------------------------------------------------------------------------------|
| 66 | 18.b     | What is the frequency of consuming iron tablets?                   | 1. Daily<br>2. Weekly<br>3. Monthly                                                | If 1. daily skip to Q 18 d<br>If 2. weekly skip to Q 18.c1 If 3. monthly skip to Q 18. c2 |
| 67 | 18.c.1   | How many days did you consume the iron tablets in a week?          |                                                                                    |                                                                                           |
| 68 | 18.c.2   | How many days did you consume the iron tablets in a month?         |                                                                                    |                                                                                           |
| 69 | 18.d     | Which tablet do you consume every day?<br>tablet supplied by:      |                                                                                    |                                                                                           |
| 70 | 18.d.1   | ASHA worker                                                        | 1. Yes<br>2. No                                                                    |                                                                                           |
| 71 | 18.d.2   | ANM / Sub - Centre                                                 | 1. Yes<br>2. No                                                                    |                                                                                           |
| 72 | 18.d.3   | Primary health center                                              | 1. Yes<br>2. No                                                                    |                                                                                           |
| 73 | 18.d.4   | Government hospital                                                | 1. Yes<br>2. No                                                                    |                                                                                           |
| 74 | 18.d.5   | Private doctor / Private pharmacy                                  | 1. Yes<br>2. No                                                                    |                                                                                           |
| 75 | 18.d.6   | Anganwadi                                                          | 1. Yes<br>2. No                                                                    |                                                                                           |
| 76 | 18.d.7   | Others                                                             | 1. Yes<br>2. No                                                                    |                                                                                           |
| 77 | 18.d.7.1 | Others (Specify)                                                   |                                                                                    |                                                                                           |
| 78 | 18.e     | Please provide details of the tablets that you are consuming daily |                                                                                    |                                                                                           |
| 79 | 18.e.1   | Time of consuming iron tablets                                     | 1. Break Fast<br>2. Lunch<br>3. Evening<br>4. Dinner<br>99. Other timing (Specify) |                                                                                           |

|    |          |                                                                                                                                                          |                                                                                    |                                                                                                                      |
|----|----------|----------------------------------------------------------------------------------------------------------------------------------------------------------|------------------------------------------------------------------------------------|----------------------------------------------------------------------------------------------------------------------|
| 80 | 18.e.1.1 | Other timing (Specify)                                                                                                                                   |                                                                                    |                                                                                                                      |
| 81 | 18.e.2   | Iron dose (in mg)                                                                                                                                        |                                                                                    |                                                                                                                      |
| 82 | 18.e.3   | Time of consuming calcium tablets                                                                                                                        | 1. Break Fast<br>2. Lunch<br>3. Evening<br>4. Dinner<br>99. Other timing (Specify) |                                                                                                                      |
| 83 | 18.e.3.1 | Other timing (Specify)                                                                                                                                   |                                                                                    |                                                                                                                      |
| 84 | 18.e.4   | Calcium dose (in mg)                                                                                                                                     |                                                                                    |                                                                                                                      |
| 85 | 18.f     | What is the time of the day when you take iron tablets?                                                                                                  | 1. Before meal<br>2. Immediately after meal<br>99.Others (Specify)                 |                                                                                                                      |
| 86 | 18.f.1   | Others (Specify)                                                                                                                                         |                                                                                    |                                                                                                                      |
| 87 | 18.g     | How many tablets have you consumed in a month?<br>(Instruction: Please provide the number of tablets)                                                    |                                                                                    |                                                                                                                      |
| 88 | 18.h     | For how many months did you consume the iron tablets?<br>(Instruction: History of IFA tablet consumption. Count backwards from the current month)        |                                                                                    |                                                                                                                      |
| 89 | 18.i     | Have you experienced any side effects while consuming the iron tablet?                                                                                   | 1. Yes<br>2. No                                                                    | If 2.no, skip to section VII. If syrup is also consumed (Q.15 c is answered 2, syrup or 3. both), skip to section VI |
| 90 | 18.j     | If you experienced any side effects while taking the iron tablet, please mention what are they (Record all the side effects reported by the participant) |                                                                                    |                                                                                                                      |
| 91 | 18.j.1   | Constipation                                                                                                                                             | 1. Yes<br>2. No                                                                    |                                                                                                                      |
| 92 | 18.j.2   | Diarrhea                                                                                                                                                 | 1. Yes                                                                             |                                                                                                                      |

|     |        |                                                                                       |                 |  |
|-----|--------|---------------------------------------------------------------------------------------|-----------------|--|
|     |        |                                                                                       | 2. No           |  |
| 93  | 18.j.3 | Nausea/ vomiting                                                                      | 1. Yes<br>2. No |  |
| 94  | 18.j.4 | Pain in abdomen                                                                       | 1. Yes<br>2. No |  |
| 95  | 18.j.5 | Black stools                                                                          | 1. Yes<br>2. No |  |
| 96  | 18.j.6 | Others                                                                                | 1. Yes<br>2. No |  |
| 97  | 18.j.7 | Others (Specify)                                                                      |                 |  |
| 98  | 18.k   | What did you do after experiencing the side-effects?                                  |                 |  |
| 99  | 18.k.1 | Stopped taking tablets completely                                                     | 1. Yes<br>2. No |  |
| 100 | 18.k.2 | Stopped for few days and continued                                                    | 1. Yes<br>2. No |  |
| 101 | 18.k.3 | Changed doctor                                                                        | 1. Yes<br>2. No |  |
| 102 | 18.k.4 | Continued in spite of side effects                                                    | 1. Yes<br>2. No |  |
| 103 | 18.k.5 | Others                                                                                | 1. Yes<br>2. No |  |
| 104 | 18.k.6 | Others (Specify)                                                                      |                 |  |
| 105 | 19     | If you are not consuming iron tablets or not consuming regularly, please mention why? |                 |  |
| 106 | 19.1   | Forgot to take iron tablets                                                           | 1. Yes<br>2. No |  |
| 107 | 19.2   | Side effects                                                                          | 1. Yes<br>2. No |  |
| 108 | 19.3   | Not interested                                                                        | 1. Yes<br>2. No |  |
| 109 | 19.4   | No time                                                                               | 1. Yes<br>2. No |  |
| 110 | 19.5   | Costly                                                                                | 1. Yes          |  |

|                                                        |        |                                                                                                      |                                     |                                                                                                                                   |
|--------------------------------------------------------|--------|------------------------------------------------------------------------------------------------------|-------------------------------------|-----------------------------------------------------------------------------------------------------------------------------------|
|                                                        |        |                                                                                                      | 2. No                               |                                                                                                                                   |
| 111                                                    | 19.6   | Healthy food is enough                                                                               | 1. Yes<br>2. No                     |                                                                                                                                   |
| 112                                                    | 19.7   | Others                                                                                               | 1. Yes<br>2. No                     |                                                                                                                                   |
| 113                                                    | 19.8   | Others (Specify)                                                                                     |                                     |                                                                                                                                   |
| <b>Section 6: History of consumption of iron syrup</b> |        |                                                                                                      |                                     |                                                                                                                                   |
| 114                                                    | 20.a   | Do / Did you regularly consume iron syrup?<br>(Instruction: To elicit regularity of IFA consumption) | 1. Yes<br>2. No                     | 1. If 1.yes, move to Q.20.b and deactivate Q.21<br><br>2. If 2. No, move to Q. 20.b and activate Q.21<br><br>Change on 23-11-2020 |
| 115                                                    | 20.b   | What is the frequency of consuming iron syrups?                                                      | 1. Daily<br>2. Weekly<br>3. Monthly | If 1.daily skip to Q 20.d<br>If 2.weekly skip to Q 20.c1 If 3.monthly skip to Q 20.c2                                             |
| 116                                                    | 20.c.1 | How many days did you consume iron syrup in a week?                                                  |                                     |                                                                                                                                   |
| 117                                                    | 20.c.2 | How many days did you consume iron syrup in a month?                                                 |                                     |                                                                                                                                   |
| 118                                                    | 20.d   | Which syrup do you consume every day? syrup supplied by:                                             |                                     |                                                                                                                                   |
| 119                                                    | 20.d.1 | ASHA worker                                                                                          | 1. Yes<br>2. No                     |                                                                                                                                   |
| 120                                                    | 20.d.2 | ANM / sub – centre                                                                                   | 1. Yes<br>2. No                     |                                                                                                                                   |
| 121                                                    | 20.d.3 | Primary health center                                                                                | 1. Yes<br>2. No                     |                                                                                                                                   |
| 122                                                    | 20.d.4 | Government hospital                                                                                  | 1. Yes<br>2. No                     |                                                                                                                                   |

|     |          |                                                                                        |                                                                                    |  |
|-----|----------|----------------------------------------------------------------------------------------|------------------------------------------------------------------------------------|--|
| 123 | 20.d.5   | Private doctor / Private pharmacy                                                      | 1. Yes<br>2. No                                                                    |  |
| 124 | 20.d.6   | Anganwadi                                                                              | 1. Yes<br>2. No                                                                    |  |
| 125 | 20.d.7   | Others                                                                                 | 1. Yes<br>2. No                                                                    |  |
| 126 | 20.d.8   | Others (Specify)                                                                       |                                                                                    |  |
| 127 | 20.e     | Please provide details of the iron syrup /calcium tablets that you are consuming daily |                                                                                    |  |
| 128 | 20.e.1   | Time of consuming iron syrup                                                           | 1. Break Fast<br>2. Lunch<br>3. Evening<br>4. Dinner<br>99. Other timing (Specify) |  |
| 129 | 20.e.1.1 | Other timing (Specify)                                                                 |                                                                                    |  |
| 130 | 20.e.2   | Iron dose (in mg)                                                                      |                                                                                    |  |
| 131 | 20.e.3   | Time of consuming calcium tablets                                                      | 1. Break Fast<br>2. Lunch<br>3. Evening<br>4. Dinner<br>99. Other timing (Specify) |  |
| 132 | 20.e.3.1 | Other timing (Specify)                                                                 |                                                                                    |  |
| 133 | 20.e.4   | Calcium dose (in mg)                                                                   |                                                                                    |  |
| 134 | 20.f     | What is the time of the day when you take the iron syrup?                              | 1. Before meal<br>2. Immediately after meal<br>99.Others (Specify)                 |  |
| 135 | 20.f.1   | Others (Specify)                                                                       |                                                                                    |  |
| 136 | 20.g     | For how many months you have consumed iron syrup?                                      |                                                                                    |  |
| 137 | 20.h     | In a month, how many bottles of iron syrup do you consume?                             |                                                                                    |  |

|     |        |                                                                                                                                                                                                               |                 |                                                             |
|-----|--------|---------------------------------------------------------------------------------------------------------------------------------------------------------------------------------------------------------------|-----------------|-------------------------------------------------------------|
| 138 | 20.i   | What is the quantity of syrup consumed by you (in ml)?<br>(Approximate quantity of syrup consumed to be understood from the bottle and the measuring cup/spoon used. If spoon, 1 tsp= 5 ml and 1 tbsp= 10 ml) |                 |                                                             |
| 139 | 20.j   | Have you experienced any side effects while consuming the iron syrup?                                                                                                                                         | 1. Yes<br>2. No | IF 2. No SKIP TO SECTION 7<br>If 1. yes go to question 20.k |
| 140 | 20.k   | If you experienced any side effects while taking the iron syrups, please mention what are they (Instruction: Record all the side effects reported by the participant)                                         |                 |                                                             |
| 141 | 20.k.1 | Constipation                                                                                                                                                                                                  | 1. Yes<br>2. No |                                                             |
| 142 | 20.k.2 | Diarrhea                                                                                                                                                                                                      | 1. Yes<br>2. No |                                                             |
| 143 | 20.k.3 | Nausea/Vomiting                                                                                                                                                                                               | 1. Yes<br>2. No |                                                             |
| 144 | 20.k.4 | Pain in abdomen                                                                                                                                                                                               | 1. Yes<br>2. No |                                                             |
| 145 | 20.k.5 | Black stools                                                                                                                                                                                                  | 1. Yes<br>2. No |                                                             |
| 146 | 20.k.6 | Others                                                                                                                                                                                                        | 1. Yes<br>2. No |                                                             |
| 147 | 20.k.7 | Others (Specify)                                                                                                                                                                                              |                 |                                                             |
| 148 | 20.l   | What did you do after experiencing the side-effects?                                                                                                                                                          |                 |                                                             |
| 149 | 20.l.1 | Stopped taking tablets completely                                                                                                                                                                             | 1. Yes<br>2. No |                                                             |
| 150 | 20.l.2 | Stopped for few days and continued                                                                                                                                                                            | 1. Yes<br>2. No |                                                             |
| 151 | 20.l.3 | Changed doctor                                                                                                                                                                                                | 1. Yes<br>2. No |                                                             |
| 152 | 20.l.4 | Continued in spite of side effects                                                                                                                                                                            | 1. Yes          |                                                             |



|                                                                                     |        |                                                                                                                                                                               |                                                                                                |  |
|-------------------------------------------------------------------------------------|--------|-------------------------------------------------------------------------------------------------------------------------------------------------------------------------------|------------------------------------------------------------------------------------------------|--|
|                                                                                     |        |                                                                                                                                                                               | 2. No                                                                                          |  |
| 153                                                                                 | 20.I.5 | Others                                                                                                                                                                        | 1. Yes<br>2. No                                                                                |  |
| 154                                                                                 | 20.I.6 | Others (Specify)                                                                                                                                                              |                                                                                                |  |
| 155                                                                                 | 21     | If you are not consuming iron syrups or not consuming regularly, please mention why?                                                                                          |                                                                                                |  |
| 156                                                                                 | 21.1   | Forgot to take iron tablets                                                                                                                                                   | 1. Yes<br>2. No                                                                                |  |
| 157                                                                                 | 21.2   | Side effects                                                                                                                                                                  | 1. Yes<br>2. No                                                                                |  |
| 158                                                                                 | 21.3   | Not interested                                                                                                                                                                | 1. Yes<br>2. No                                                                                |  |
| 159                                                                                 | 21.4   | No time                                                                                                                                                                       | 1. Yes<br>2. No                                                                                |  |
| 160                                                                                 | 21.5   | Costly                                                                                                                                                                        | 1. Yes<br>2. No                                                                                |  |
| 161                                                                                 | 21.6   | Healthy food is enough                                                                                                                                                        | 1. Yes<br>2. No                                                                                |  |
| 162                                                                                 | 21.7   | Others                                                                                                                                                                        | 1. Yes<br>2. No                                                                                |  |
| 163                                                                                 | 21.8   | Others (Specify)                                                                                                                                                              |                                                                                                |  |
| <b>Section:7. Information on habitual intake of foods affecting iron absorption</b> |        |                                                                                                                                                                               |                                                                                                |  |
| 164                                                                                 | 22     | Do you have the habit of taking tea or coffee along with meals?                                                                                                               | 1. Yes, always<br>2. Yes, sometimes<br>3. No<br>4. Don't have the habit of taking tea/coffee   |  |
| 165                                                                                 | 23     | Do you have the habit of eating fruits such as guava/ orange/ papaya along with meals?<br>(Instruction: The response will pertain to the intake of any of these three fruits) | 1. Yes, always<br>2. Yes, sometimes<br>3. No<br>4. Don't have the habit of eating these fruits |  |

|     |      |                                                                                                                                                                       |                                                                                                                                                                              |                                                             |
|-----|------|-----------------------------------------------------------------------------------------------------------------------------------------------------------------------|------------------------------------------------------------------------------------------------------------------------------------------------------------------------------|-------------------------------------------------------------|
| 166 | 24   | How frequently do you eat non-vegetarian food?                                                                                                                        | 1. No, I don't eat non-veg<br>2. Yes, once in a while<br>3. Yes, once in a month<br>4. Yes, weekly once<br>5. Yes, weekly 2-3 times<br>6. Yes, daily<br>7. Weekly, 4-6 times |                                                             |
| 167 | 25.a | Did you consume fortified beverages in the last one month?<br>(Instruction: fortified beverages examples are horlicks, boost, complan)                                | 1. Yes<br>2. No                                                                                                                                                              | If 2. No skip to Section 8<br>If 1. yes go to question 25.b |
| 168 | 25.b | Approximately, how frequently did you consume the fortified beverages                                                                                                 | 1. Daily<br>2. Weekly 2-3 times<br>3. Weekly once<br>4. Monthly once<br>5. Weekly, 4-6 times                                                                                 |                                                             |
|     |      | <b>Section:8 Morbidity</b>                                                                                                                                            |                                                                                                                                                                              |                                                             |
| 169 | 26   | Did you suffer from fever/ cold during the past two weeks?                                                                                                            | 1. Yes<br>2. No                                                                                                                                                              |                                                             |
| 170 | 27   | Did you suffer from acute respiratory tract infection during the past two weeks?<br>(Instruction: Fever lasting for more than 3 days along with breathing difficulty) | 1. Yes<br>2. No                                                                                                                                                              |                                                             |
| 171 | 28   | Did you have diarrhea during the past two weeks?<br>(loose stools - 6 or more episodes/day, requiring medication)                                                     | 1. Yes<br>2. No                                                                                                                                                              |                                                             |
| 172 | 29   | Did you suffer from vomiting/ nausea in the past two weeks?                                                                                                           | 1. Yes<br>2. No                                                                                                                                                              |                                                             |
| 173 | 30   | Did you suffer from pneumonia/ bronchitis in the past two weeks                                                                                                       | 1. Yes<br>2. No                                                                                                                                                              |                                                             |
|     |      | <b>Section:9 Height &amp; Weight</b>                                                                                                                                  |                                                                                                                                                                              |                                                             |
| 174 | 31   | Height (In cm)                                                                                                                                                        |                                                                                                                                                                              |                                                             |
| 175 | 32   | Weight (In Kg)                                                                                                                                                        |                                                                                                                                                                              |                                                             |

**Lactating women (Woman with >6 months old child/children)**

| SINo | QN    | Question                                                                                                           | Options                                                                                                                                                                                                                                | Skip logic                                                                      |
|------|-------|--------------------------------------------------------------------------------------------------------------------|----------------------------------------------------------------------------------------------------------------------------------------------------------------------------------------------------------------------------------------|---------------------------------------------------------------------------------|
|      |       | <b>Section: 1 Knowledge of anemia</b>                                                                              |                                                                                                                                                                                                                                        |                                                                                 |
| 1    | 1.a   | Have you heard about anemia?<br>(Instruction: If the person is doubtful or not saying anything, opt for no answer) | 1. Yes<br>2. No<br>3. No answer                                                                                                                                                                                                        | If 2. no or 77. no answer, skip to Section 2<br>If 1.yes then goto question 6.b |
| 2    | 1.b   | Can you tell me the causes of anemia?                                                                              | 1. Inadequate food<br>2. Blood loss<br>3. Worm infestation<br>4. Heredity<br>77. Don't know<br>99. Others (Specify)                                                                                                                    |                                                                                 |
| 3    | 1.b.1 | Others (Specify)                                                                                                   |                                                                                                                                                                                                                                        |                                                                                 |
| 4    | 1.c   | Can you tell me how can we recognize someone with anemia?                                                          | 1. Low energy / weakness<br>2. Pallor / pale eyes, nails<br>3. Spoon shaped nails<br>4. Fall sick frequently<br>5. Blood test<br>77. Don't know<br>99. Others (Specify)                                                                |                                                                                 |
| 5    | 1.c.1 | Others (Specify)                                                                                                   |                                                                                                                                                                                                                                        |                                                                                 |
| 6    | 1.d   | How can anemia be prevented?                                                                                       | 1. Eat iron - rich foods<br>2. Eat vitamin – c rich foods during or right after meals<br>3. Take iron supplements if prescribed<br>4. Treat other causes of anemia (diseases and infections)<br>77. Don't know<br>99. Others (Specify) |                                                                                 |
| 7    | 1.d.1 | Others (Specify)                                                                                                   |                                                                                                                                                                                                                                        |                                                                                 |
|      |       | <b>Section 2: General information</b>                                                                              |                                                                                                                                                                                                                                        |                                                                                 |

|    |      |                                                                                                                                                     |                                                                                                      |                                                                                     |
|----|------|-----------------------------------------------------------------------------------------------------------------------------------------------------|------------------------------------------------------------------------------------------------------|-------------------------------------------------------------------------------------|
| 8  | 2    | How many children do you have?<br>(Instruction: Number of children to be entered)                                                                   |                                                                                                      |                                                                                     |
| 9  | 3.a  | Do you know the date of birth of your youngest child?                                                                                               | 1. Yes<br>2. No                                                                                      | If 1. Yes is selected then enable que 3.b<br>If 2. No then skip to question 3.c     |
| 10 | 3.b  | What is the date of birth of your youngest child?                                                                                                   |                                                                                                      |                                                                                     |
| 11 | 3.c  | What is the age of your youngest child? (in months)                                                                                                 |                                                                                                      |                                                                                     |
| 12 | 4    | Where was your last delivery done?                                                                                                                  | 1. Government hospital<br>2. Private hospital<br>3. Home delivery by ANM<br>4. Home delivery by ASHA |                                                                                     |
| 13 | 5    | What was the mode of delivery?                                                                                                                      | 1. Normal/ Assisted<br>2. Caesarian                                                                  |                                                                                     |
| 14 | 6    | Was it a singleton/ multiple pregnancy?                                                                                                             | 1. Singleton<br>2. Multiple                                                                          |                                                                                     |
| 15 | 7    | How many ANC visits did you undergo while being pregnant?                                                                                           |                                                                                                      |                                                                                     |
| 16 | 8    | After delivery, how many times did you visit a health facility?<br>(Instruction: Visits made to health facility for the mother need to be elicited) |                                                                                                      |                                                                                     |
| 17 | 9    | Has your menstruation resumed after delivery?                                                                                                       | 1. Yes<br>2. No                                                                                      |                                                                                     |
| 18 | 10.a | Are you exclusively breast-feeding the child?<br>(Instruction: Exclusive breast feeding means no solid or liquid food other than breast milk)       | 1. Yes<br>2. Yes, but giving water<br>3. No                                                          | If 1.Yes skip to Section 3<br>If 2.Yes,but giving water or 3.No go to question 10.b |

|    |        |                                                                                                                                                         |                                             |                                                                                  |
|----|--------|---------------------------------------------------------------------------------------------------------------------------------------------------------|---------------------------------------------|----------------------------------------------------------------------------------|
| 19 | 10.b   | If you are not exclusively breastfeeding the baby, please provide reasons (Instruction: Multiple choices are possible for this question)                |                                             |                                                                                  |
| 20 | 10.b.1 | Not enough milk                                                                                                                                         | 1. Yes<br>2. No                             |                                                                                  |
| 21 | 10.b.2 | Mother not well                                                                                                                                         | 1. Yes<br>2. No                             |                                                                                  |
| 22 | 10.b.3 | Mother going to work                                                                                                                                    | 1. Yes<br>2. No                             |                                                                                  |
| 23 | 10.b.4 | Others                                                                                                                                                  | 1. Yes<br>2. No                             |                                                                                  |
| 24 | 10.b.5 | Others (Specify)                                                                                                                                        |                                             |                                                                                  |
|    |        | <b>Section 3: Activities by ASHA</b>                                                                                                                    |                                             |                                                                                  |
| 25 | 11     | Number of house visits by ASHA after delivery                                                                                                           | 1. One<br>2. Two<br>3. Three<br>4. No Visit | If 4.No visit skip to Section 4<br>If 1.One or 2.Two or 3.Three goto question 12 |
| 26 | 12     | PNC(Post Natal Care) activities (Please list the activities carried out by asha)                                                                        |                                             |                                                                                  |
| 27 | 12.a   | Advice for mother                                                                                                                                       | 1. Yes<br>2. No                             | -                                                                                |
| 28 | 12.b   | Advice for baby care                                                                                                                                    | 1. Yes<br>2. No                             | -                                                                                |
| 29 | 12.c   | Supplied IFA for mother                                                                                                                                 | 1. Yes<br>2. No                             | -                                                                                |
| 30 | 12.d   | No advice given                                                                                                                                         | 1. Yes<br>2. No                             | -                                                                                |
|    |        | <b>Section 4. History of screening for anemia (Instruction: Capture the post partum history till the date of survey. It should not exceed 6 months)</b> |                                             |                                                                                  |

|    |        |                                                                                                                              |                                                                                                                                     |                                                                                                                                             |
|----|--------|------------------------------------------------------------------------------------------------------------------------------|-------------------------------------------------------------------------------------------------------------------------------------|---------------------------------------------------------------------------------------------------------------------------------------------|
| 31 | 13.a   | Have you got your blood tested for hemoglobin after your last delivery?<br>(Probe: Check Hb / done blood test)               | 1. Yes<br>2. No<br>77. Don't know                                                                                                   | If 1.Yes then go to question 13.b And Activate 14.a<br><br>If the answer is 2.No & 77.Don't know, skip to Qn. 14.a<br><br>Priority 1 change |
| 32 | 13.b   | From where did you get tested?<br>(In case if the Hb has been tested multiple times; the most recent one should be recorded) | 1. Primary health centre<br>2. Sub-centre<br>3. Government hospital<br>4. Private hospital<br>5. Private lab<br>99.Others (specify) |                                                                                                                                             |
| 33 | 13.b.1 | Others (Specify)                                                                                                             |                                                                                                                                     |                                                                                                                                             |
| 34 | 13.c   | How do you want to report the hemoglobin level?                                                                              | 1. Record<br>2. Recall<br>77. Don't know                                                                                            | if 77.Don't know skip to question 14.a                                                                                                      |
| 35 | 13.d   | Haemoglobin level (Value in g/dl)                                                                                            |                                                                                                                                     | Min-2<br>Max-20                                                                                                                             |
| 36 | 14.a   | Did you receive/buy iron tablets/iron syrups after delivery?                                                                 | 1. Yes<br>2. No                                                                                                                     | If 2.no, skip to Q15<br>If 1.Yes goto question 14.b                                                                                         |
| 37 | 14.b   | Please mention, from where did you receive?                                                                                  |                                                                                                                                     |                                                                                                                                             |
| 38 | 14.b.1 | ASHA worker                                                                                                                  | 1. Yes<br>2. No                                                                                                                     |                                                                                                                                             |
| 39 | 14.b.2 | ANM / sub – centre                                                                                                           | 1. Yes<br>2. No                                                                                                                     |                                                                                                                                             |
| 40 | 14.b.3 | Primary health center                                                                                                        | 1. Yes<br>2. No                                                                                                                     |                                                                                                                                             |

|    |        |                                                                                                                                                              |                                                                                                         |                                                                                                                                                                                                                                                                                                                                                                                   |
|----|--------|--------------------------------------------------------------------------------------------------------------------------------------------------------------|---------------------------------------------------------------------------------------------------------|-----------------------------------------------------------------------------------------------------------------------------------------------------------------------------------------------------------------------------------------------------------------------------------------------------------------------------------------------------------------------------------|
| 41 | 14.b.4 | Government hospital                                                                                                                                          | 1. Yes<br>2. No                                                                                         |                                                                                                                                                                                                                                                                                                                                                                                   |
| 42 | 14.b.5 | Private doctor / private pharmacy                                                                                                                            | 1. Yes<br>2. No                                                                                         |                                                                                                                                                                                                                                                                                                                                                                                   |
| 43 | 14.b.6 | Anganwadi                                                                                                                                                    | 1. Yes<br>2. No                                                                                         |                                                                                                                                                                                                                                                                                                                                                                                   |
| 44 | 14.b.7 | Others                                                                                                                                                       | 1. Yes<br>2. No                                                                                         |                                                                                                                                                                                                                                                                                                                                                                                   |
| 45 | 14.b.8 | Others (Specify)                                                                                                                                             |                                                                                                         |                                                                                                                                                                                                                                                                                                                                                                                   |
| 46 | 14.c   | Did you consume the tablets/<br>syrups received by you?<br>(Instruction: Elicit information on<br>habitual consumption/ attitude<br>towards tablet or syrup) | 1. Tablet<br>2. Syrup<br>3. Both iron tablet and syrup<br>4. Didn't consume<br>(either tablet or syrup) | If 1.Tablet skip to section 5<br>and must fill section V and<br>need not fill section 6,<br>If 2.Syrups skip to section 6<br>and must fill section VI and<br>need not fill section 5,<br>If 3.Tablet & Syrup skip to<br>section 5 and must fill<br>section V & VI,<br>If 4.Dint't consume (either<br>table or syrup) skip to<br>question 15 and need not<br>fill section V and VI |
| 47 | 15     | If you did not take/consume iron<br>tablets /syrup, please mention<br>why?                                                                                   |                                                                                                         |                                                                                                                                                                                                                                                                                                                                                                                   |
| 48 | 15.1   | Forget to take iron tablets                                                                                                                                  | 1. Yes<br>2. No                                                                                         |                                                                                                                                                                                                                                                                                                                                                                                   |
| 49 | 15.2   | Side effects                                                                                                                                                 | 1. Yes<br>2. No                                                                                         |                                                                                                                                                                                                                                                                                                                                                                                   |
| 50 | 15.3   | Not interested                                                                                                                                               | 1. Yes<br>2. No                                                                                         |                                                                                                                                                                                                                                                                                                                                                                                   |
| 51 | 15.4   | No time                                                                                                                                                      | 1. Yes<br>2. No                                                                                         |                                                                                                                                                                                                                                                                                                                                                                                   |

|                                                                           |        |                                                                                                  |                                     |                                                                                                                                             |
|---------------------------------------------------------------------------|--------|--------------------------------------------------------------------------------------------------|-------------------------------------|---------------------------------------------------------------------------------------------------------------------------------------------|
| 52                                                                        | 15.5   | Costly                                                                                           | 1. Yes<br>2. No                     |                                                                                                                                             |
| 53                                                                        | 15.6   | Healthy food is enough.                                                                          | 1. Yes<br>2. No                     |                                                                                                                                             |
| 54                                                                        | 15.7   | Others                                                                                           | 1. Yes<br>2. No                     |                                                                                                                                             |
| 55                                                                        | 15.8   | Others (Specify)                                                                                 |                                     |                                                                                                                                             |
| <b>Section:5. History of consumption of iron tablets [after delivery]</b> |        |                                                                                                  |                                     |                                                                                                                                             |
| 56                                                                        | 16.a   | Do you regularly consume iron tablets?<br>(Instruction: To elicit regularity of IFA consumption) | 1. Yes<br>2. No                     | 1. If 1.yes, move to Q.16.b and deactivate Q.17<br><br>2. If 2. No, move to Q. 16.b and activate Q.17<br><br>Change on 23-11-2020           |
| 57                                                                        | 16.b   | What is the frequency of consuming iron tablets?                                                 | 1. Daily<br>2. Weekly<br>3. Monthly | If 1.Daily Skip to 16.d question<br>If 2.Weekly, skip to Q16.c.1 and deactivate Q16.c.2<br>3.Monthly skip to Q16.c.2 and deactivate Q16.c.1 |
| 58                                                                        | 16.c.1 | How many days did you consume the iron tablets in a week?                                        |                                     |                                                                                                                                             |
| 59                                                                        | 16.c.2 | How many days did you consume the iron tablets in a month?                                       |                                     |                                                                                                                                             |
| 60                                                                        | 16.d   | Which tablet do you consume every day?<br>tablet supplied by:                                    |                                     |                                                                                                                                             |
| 61                                                                        | 16.d.1 | ASHA worker                                                                                      | 1. Yes<br>2. No                     |                                                                                                                                             |
| 62                                                                        | 16.d.2 | ANM / Sub-centre                                                                                 | 1. Yes<br>2. No                     |                                                                                                                                             |
| 63                                                                        | 16.d.3 | Primary health center                                                                            | 1. Yes<br>2. No                     |                                                                                                                                             |



|    |          |                                                                    |                                                                                    |  |
|----|----------|--------------------------------------------------------------------|------------------------------------------------------------------------------------|--|
| 64 | 16.d.4   | Government hospital                                                | 1. Yes<br>2. No                                                                    |  |
| 65 | 16.d.5   | Private doctor/ Private pharmacy                                   | 1. Yes<br>2. No                                                                    |  |
| 66 | 16.d.6   | Anganwadi                                                          | 1. Yes<br>2. No                                                                    |  |
| 67 | 16.d.7   | Others                                                             | 1. Yes<br>2. No                                                                    |  |
| 68 | 16.d.8   | Others (Specify)                                                   |                                                                                    |  |
| 69 | 16.e     | Please provide details of the tablets that you are consuming daily |                                                                                    |  |
| 70 | 16.e.1   | Time of consuming iron tablets                                     | 1. Break Fast<br>2. Lunch<br>3. Evening<br>4. Dinner<br>99. Other timing (Specify) |  |
| 71 | 16.e.1.1 | Other timing (Specify)                                             |                                                                                    |  |
| 72 | 16.e.2   | Iron dose (in mg)                                                  |                                                                                    |  |
| 73 | 16.e.3   | Time of consuming calcium tablets                                  | 1. Break Fast<br>2. Lunch<br>3. Evening<br>4. Dinner<br>99. Other timing (Specify) |  |
| 74 | 16.e.3.1 | Other timing (Specify)                                             |                                                                                    |  |
| 75 | 16.e.4   | Calcium dose (in mg)                                               |                                                                                    |  |
| 76 | 16.f     | What is the time of the day when you take iron tablets?            | 1. Before meal<br>2. Immediately after meal<br>99.Others (Specify)                 |  |
| 77 | 16.f.1   | Others (Specify)                                                   |                                                                                    |  |

|    |        |                                                                                                                                                                        |                 |                                                                                                                                                   |
|----|--------|------------------------------------------------------------------------------------------------------------------------------------------------------------------------|-----------------|---------------------------------------------------------------------------------------------------------------------------------------------------|
| 78 | 16.g   | How many tablets have you consumed in a month?<br>(Instruction: Please provide the number of tablets)                                                                  |                 |                                                                                                                                                   |
| 79 | 16.h   | For how many months did you consume the iron tablets?<br>(Instruction: History of IFA tablet consumption. Count backwards from the current month)                      |                 |                                                                                                                                                   |
| 80 | 16.i   | Have you experienced any side effects while consuming the iron tablet?                                                                                                 | 1. Yes<br>2. No | If 2.No skip to Section 7. If syrup is also consumed (Q14.c 2.Syrup or 3.Both tablet and Syrup) skip to section 6.<br>If 1.Yes goto question 16.j |
| 81 | 16.j   | If you experienced any side effects while taking the iron tablets, please mention what are they (Instruction: Record all the side effects reported by the participant) |                 |                                                                                                                                                   |
| 82 | 16.j.1 | Constipation                                                                                                                                                           | 1. Yes<br>2. No |                                                                                                                                                   |
| 83 | 16.j.2 | Diarrhea                                                                                                                                                               | 1. Yes<br>2. No |                                                                                                                                                   |
| 84 | 16.j.3 | Nausea/ vomiting                                                                                                                                                       | 1. Yes<br>2. No |                                                                                                                                                   |
| 85 | 16.j.4 | Pain in abdomen                                                                                                                                                        | 1. Yes<br>2. No |                                                                                                                                                   |
| 86 | 16.j.5 | Black stools                                                                                                                                                           | 1. Yes<br>2. No |                                                                                                                                                   |
| 87 | 16.j.6 | Others                                                                                                                                                                 | 1. Yes<br>2. No |                                                                                                                                                   |
| 88 | 16.j.7 | Others (Specify)                                                                                                                                                       |                 |                                                                                                                                                   |
| 89 | 16.k   | What did you do after experiencing the side-effects?                                                                                                                   |                 |                                                                                                                                                   |
| 90 | 16.k.1 | Stopped taking tablets completely                                                                                                                                      | 1. Yes<br>2. No |                                                                                                                                                   |

|     |        |                                                                                       |                 |  |
|-----|--------|---------------------------------------------------------------------------------------|-----------------|--|
| 91  | 16.k.2 | Stopped for few days and continued                                                    | 1. Yes<br>2. No |  |
| 92  | 16.k.3 | Changed doctor                                                                        | 1. Yes<br>2. No |  |
| 93  | 16.k.4 | Continued in spite of side effects                                                    | 1. Yes<br>2. No |  |
| 94  | 16.k.5 | Others                                                                                | 1. Yes<br>2. No |  |
| 95  | 16.k.6 | Others (Specify)                                                                      |                 |  |
| 96  | 17     | If you are not consuming iron tablets or not consuming regularly, please mention why? |                 |  |
| 97  | 17.1   | Forgot to take iron tablets                                                           | 1. Yes<br>2. No |  |
| 98  | 17.2   | Side effects                                                                          | 1. Yes<br>2. No |  |
| 99  | 17.3   | Not interested                                                                        | 1. Yes<br>2. No |  |
| 100 | 17.4   | No time                                                                               | 1. Yes<br>2. No |  |
| 101 | 17.5   | Costly                                                                                | 1. Yes<br>2. No |  |
| 102 | 17.6   | Healthy food is enough                                                                | 1. Yes<br>2. No |  |
| 103 | 17.7   | Others                                                                                | 1. Yes<br>2. No |  |
| 104 | 17.8   | Others (Specify)                                                                      |                 |  |
|     |        | <b>Section: 6. History of consuming iron syrup</b>                                    |                 |  |

|     |        |                                                                                                |                                     |                                                                                                                                   |
|-----|--------|------------------------------------------------------------------------------------------------|-------------------------------------|-----------------------------------------------------------------------------------------------------------------------------------|
| 105 | 18.a   | Do you regularly consume iron syrup?<br>(Instruction: To elicit regularity of IFA consumption) | 1. Yes<br>2. No                     | 1. If 1.yes, move to Q.18.b and deactivate Q.19<br><br>2. If 2. No, move to Q. 18.b and activate Q.19<br><br>Change on 23-11-2020 |
| 106 | 18.b   | What is the frequency of consuming iron syrups?                                                | 1. Daily<br>2. Weekly<br>3. Monthly | If 1.Daily Skip to question 18.d<br>If 2.Weekly or 3.Monthly goto question 18.c                                                   |
| 107 | 18.c.1 | How many days did you consume the iron syrup in a week?                                        |                                     |                                                                                                                                   |
| 108 | 18.c.2 | How many days did you consume the iron syrup in a month?                                       |                                     |                                                                                                                                   |
| 109 | 18.d   | Which syrup do you consume every day?<br>syrup supplied by:                                    |                                     |                                                                                                                                   |
| 110 | 18.d.1 | ASHA worker                                                                                    | 1. Yes<br>2. No                     |                                                                                                                                   |
| 111 | 18.d.2 | ANM / sub – centre                                                                             | 1. Yes<br>2. No                     |                                                                                                                                   |
| 112 | 18.d.3 | Primary health center                                                                          | 1. Yes<br>2. No                     |                                                                                                                                   |
| 113 | 18.d.4 | Government hospital                                                                            | 1. Yes<br>2. No                     |                                                                                                                                   |
| 114 | 18.d.5 | Private doctor / private pharmacy                                                              | 1. Yes<br>2. No                     |                                                                                                                                   |
| 115 | 18.d.5 | Anganwadi                                                                                      | 1. Yes<br>2. No                     |                                                                                                                                   |
| 116 | 18.d.6 | Others                                                                                         | 1. Yes<br>2. No                     |                                                                                                                                   |
| 117 | 18.d.7 | Others (Specify)                                                                               |                                     |                                                                                                                                   |
| 118 | 18.e   | Please provide details of the iron syrup / calcium tablets that you are consuming daily        |                                     |                                                                                                                                   |

|     |              |                                                                                                                                                                                                               |                                                                                       |                                                               |
|-----|--------------|---------------------------------------------------------------------------------------------------------------------------------------------------------------------------------------------------------------|---------------------------------------------------------------------------------------|---------------------------------------------------------------|
| 119 | 18.e.1       | Time of consuming iron syrup                                                                                                                                                                                  | 1. Break Fast<br>2. Lunch<br>3. Evening<br>4. Dinner<br>99. Other timing<br>(Specify) |                                                               |
| 120 | 18.e.1.<br>1 | Other timing (Specify)                                                                                                                                                                                        |                                                                                       |                                                               |
| 121 | 18.e.2       | Iron dose (in mg)                                                                                                                                                                                             |                                                                                       |                                                               |
| 122 | 18.e.3       | Time of consuming calcium tablets                                                                                                                                                                             | 1. Break Fast<br>2. Lunch<br>3. Evening<br>4. Dinner<br>99. Other timing<br>(Specify) |                                                               |
| 123 | 18.e.3.<br>1 | Other timing (Specify)                                                                                                                                                                                        |                                                                                       |                                                               |
| 124 | 18.e.4       | Calcium dose (in mg)                                                                                                                                                                                          |                                                                                       |                                                               |
| 125 | 18.f         | What is the time of the day when you take the iron syrup?                                                                                                                                                     | 1. Before meal<br>2. Immediately after meal<br>99.Others (Specify)                    |                                                               |
| 126 | 18.f.1       | Others (Specify)                                                                                                                                                                                              |                                                                                       |                                                               |
| 127 | 18.g         | For how many months you have consumed iron syrup?                                                                                                                                                             |                                                                                       |                                                               |
| 128 | 18.h         | In a month, how many bottles of iron syrup do you consume?                                                                                                                                                    |                                                                                       |                                                               |
| 129 | 18.i         | What is the quantity of syrup consumed by you (in ml)?<br>(Approximate quantity of syrup consumed to be understood from the bottle and the measuring cup/spoon used. If spoon, 1 tsp= 5 ml and 1 tbsp= 10 ml) |                                                                                       |                                                               |
| 130 | 18.j         | Have you experienced any side effects while consuming the iron syrup?                                                                                                                                         | 1. Yes<br>2. No                                                                       | IF 2.No SKIP TO SECTION 7<br>If 1.Yes then goto question 18.k |

|     |        |                                                                                                                                                                      |                 |  |
|-----|--------|----------------------------------------------------------------------------------------------------------------------------------------------------------------------|-----------------|--|
| 131 | 18.k   | If you experienced any side effects while taking the iron syrups, please mention what are they(Instruction: record all the side effects reported by the participant) |                 |  |
| 132 | 18.k.1 | Constipation                                                                                                                                                         | 1. Yes<br>2. No |  |
| 133 | 18.k.2 | Diarrhea                                                                                                                                                             | 1. Yes<br>2. No |  |
| 134 | 18.k.3 | Nausea/ vomiting                                                                                                                                                     | 1. Yes<br>2. No |  |
| 135 | 18.k.4 | Pain in abdomen                                                                                                                                                      | 1. Yes<br>2. No |  |
| 136 | 18.k.5 | Black stools                                                                                                                                                         | 1. Yes<br>2. No |  |
| 137 | 18.k.6 | Others                                                                                                                                                               | 1. Yes<br>2. No |  |
| 138 | 18k.7  | Others (Specify)                                                                                                                                                     |                 |  |
| 139 | 18.l   | What did you do after experiencing the side-effects?                                                                                                                 |                 |  |
| 140 | 18.l.1 | Stopped taking tablets completely                                                                                                                                    | 1. Yes<br>2. No |  |
| 141 | 18.l.2 | Stopped for few days and continued                                                                                                                                   | 1. Yes<br>2. No |  |
| 142 | 18.l.3 | Changed doctor                                                                                                                                                       | 1. Yes<br>2. No |  |
| 143 | 18.l.4 | Continued in spite of side effects                                                                                                                                   | 1. Yes<br>2. No |  |
| 144 | 18.l.5 | Others                                                                                                                                                               | 1. Yes<br>2. No |  |
| 145 | 18.l.6 | Others (Specify)                                                                                                                                                     |                 |  |
| 146 | 19     | If you are not consuming iron syrups or not consuming regularly, please mention why?                                                                                 |                 |  |

|                                                                     |      |                                                                                                                                                                               |                                                                                                                                     |  |
|---------------------------------------------------------------------|------|-------------------------------------------------------------------------------------------------------------------------------------------------------------------------------|-------------------------------------------------------------------------------------------------------------------------------------|--|
| 147                                                                 | 19.1 | Forgot to take iron tablets                                                                                                                                                   | 1. Yes<br>2. No                                                                                                                     |  |
| 148                                                                 | 19.2 | Side effects                                                                                                                                                                  | 1. Yes<br>2. No                                                                                                                     |  |
| 149                                                                 | 19.3 | Not interested                                                                                                                                                                | 1. Yes<br>2. No                                                                                                                     |  |
| 150                                                                 | 19.4 | No time                                                                                                                                                                       | 1. Yes<br>2. No                                                                                                                     |  |
| 151                                                                 | 19.5 | Costly                                                                                                                                                                        | 1. Yes<br>2. No                                                                                                                     |  |
| 152                                                                 | 19.6 | Healthy food is enough                                                                                                                                                        | 1. Yes<br>2. No                                                                                                                     |  |
| 153                                                                 | 19.7 | Others                                                                                                                                                                        | 1. Yes<br>2. No                                                                                                                     |  |
| 154                                                                 | 19.8 | Others (Specify)                                                                                                                                                              |                                                                                                                                     |  |
| <b>Section:7. Information on habitual intake of inhibitory diet</b> |      |                                                                                                                                                                               |                                                                                                                                     |  |
| 155                                                                 | 20   | Do you have the habit of taking tea or coffee along with meals?                                                                                                               | 1. Yes, always<br>2. Yes, sometimes<br>3. No<br>4. Don't have the habit of taking tea/coffee                                        |  |
| 156                                                                 | 21   | Do you have the habit of eating fruits such as guava/ orange/ papaya along with meals?<br>(Instruction: The response will pertain to the intake of any of these three fruits) | 1. Yes, always<br>2. Yes, sometimes<br>3. No<br>4. Don't have the habit of eating these fruits                                      |  |
| 157                                                                 | 22   | How frequently do you eat non-vegetarian food?                                                                                                                                | 1. No, I don't eat non-veg<br>2. Yes, once in a while<br>3. Yes, once in a month<br>4. Yes, weekly once<br>5. Yes, weekly 2-3 times |  |

|                                       |      |                                                                                                                                                                       |                                                                                              |                                                          |
|---------------------------------------|------|-----------------------------------------------------------------------------------------------------------------------------------------------------------------------|----------------------------------------------------------------------------------------------|----------------------------------------------------------|
|                                       |      |                                                                                                                                                                       | 6. Yes, daily<br>7. Weekly, 4-6 times                                                        |                                                          |
| 158                                   | 23.a | Did you consume fortified beverages in the last one month?<br>(Instruction: fortified beverages examples are Horlicks, Boost, complan)                                | 1. Yes<br>2. No                                                                              | If 2.No skip to Section 8<br>If 1.Yes goto question 23.b |
| 159                                   | 23.b | Approximately, how frequently did you consume the fortified beverages?                                                                                                | 1. Daily<br>2. Weekly 2-3 times<br>3. Weekly once<br>4. Monthly once<br>5. Weekly, 4-6 times |                                                          |
| <b>Section: 8 Morbidity</b>           |      |                                                                                                                                                                       |                                                                                              |                                                          |
| 160                                   | 24   | Did you suffer from fever/ cold during the past two weeks?                                                                                                            | 1. Yes<br>2. No                                                                              |                                                          |
| 161                                   | 25   | Did you suffer from acute respiratory tract infection during the past two weeks?<br>(Instruction: Fever lasting for more than 3 days along with breathing difficulty) | 1. Yes<br>2. No                                                                              |                                                          |
| 162                                   | 26   | Did you have diarrhea during the past two weeks?<br>(loose stools - 6 or more episodes/day, requiring medication)                                                     | 1. Yes<br>2. No                                                                              |                                                          |
| 163                                   | 27   | Did you suffer from vomiting/ nausea in the past two weeks?                                                                                                           | 1. Yes<br>2. No                                                                              |                                                          |
| 164                                   | 28   | Did you suffer from pneumonia/ bronchitis in the past two weeks                                                                                                       | 1. Yes<br>2. No                                                                              |                                                          |
| <b>Section: 9 Height &amp; Weight</b> |      |                                                                                                                                                                       |                                                                                              |                                                          |
| 165                                   | 29   | Height (In cm)                                                                                                                                                        |                                                                                              |                                                          |
| 166                                   | 30   | Weight (In Kg)                                                                                                                                                        |                                                                                              |                                                          |



| Section 10. History of deworming |    |                                                                                                          |                                        |                     |
|----------------------------------|----|----------------------------------------------------------------------------------------------------------|----------------------------------------|---------------------|
| 167                              | 31 | Did the child receive de-worming tablets/Syrup in past one year from the date of survey?                 | 1 - Yes<br>2 - No<br>77 - Don't know   | 1. If 1.Yes Goto 32 |
| 168                              | 32 | How many times did he/ she receive deworming tablets/Syrup in the past one year from the date of survey? | 1 - Once<br>2 - Twice<br>77 - Not sure |                     |

**Non- pregnant and Non-lactating women and Men**

| SINo | QN    | Question                                                                                                           | Options                                                                                                                                                                 | Skip logic                                                                      |
|------|-------|--------------------------------------------------------------------------------------------------------------------|-------------------------------------------------------------------------------------------------------------------------------------------------------------------------|---------------------------------------------------------------------------------|
|      |       | <b>Basic details</b>                                                                                               |                                                                                                                                                                         |                                                                                 |
| 1    | 1     | House ID number                                                                                                    |                                                                                                                                                                         |                                                                                 |
| 2    | 2     | Individual ID number                                                                                               |                                                                                                                                                                         |                                                                                 |
| 3    | 3     | Date of survey                                                                                                     |                                                                                                                                                                         |                                                                                 |
| 4    | 4     | Survey start time                                                                                                  |                                                                                                                                                                         |                                                                                 |
| 5    | 5     | Survey done by                                                                                                     |                                                                                                                                                                         |                                                                                 |
|      |       | <b>Section:1 Knowledge on anemia</b>                                                                               |                                                                                                                                                                         |                                                                                 |
| 6    | 1.a   | Have you heard about anemia?<br>(Instruction: If the person is doubtful or not saying anything, opt for no answer) | 1. Yes<br>2. No<br>3. No answer                                                                                                                                         | If 2. no or 77. no answer, skip to Section 2<br>If 1.yes then goto question 6.b |
| 7    | 1.b   | Can you tell me the causes of anemia?                                                                              | 1. Inadequate food<br>2. Blood loss<br>3. Worm infestation<br>4. Heredity<br>77. Don't know<br>99. Others (Specify)                                                     |                                                                                 |
| 8    | 1.b.1 | Others (Specify)                                                                                                   |                                                                                                                                                                         |                                                                                 |
| 9    | 1.c   | Can you tell me how can we recognize someone with anemia?                                                          | 1. Low energy / weakness<br>2. Pallor / pale eyes, nails<br>3. Spoon shaped nails<br>4. Fall sick frequently<br>5. Blood test<br>77. Don't know<br>99. Others (Specify) |                                                                                 |
| 10   | 1.c.1 | Others (Specify)                                                                                                   |                                                                                                                                                                         |                                                                                 |

|    |       |                                                                                                                           |                                                                                                                                                                                                                                        |                                                                                  |
|----|-------|---------------------------------------------------------------------------------------------------------------------------|----------------------------------------------------------------------------------------------------------------------------------------------------------------------------------------------------------------------------------------|----------------------------------------------------------------------------------|
| 11 | 1.d   | How can anemia be prevented?                                                                                              | 1. Eat iron - rich foods<br>2. Eat vitamin – c rich foods during or right after meals<br>3. Take iron supplements if prescribed<br>4. Treat other causes of anemia (diseases and infections)<br>77. Don't know<br>99. Others (Specify) |                                                                                  |
| 12 | 1.d.1 | Others (Specify)                                                                                                          |                                                                                                                                                                                                                                        |                                                                                  |
|    |       | <b>Section 2: History of screening for anemia and treatment<br/>(Instruction: Past 6 months from the date of survey)</b>  |                                                                                                                                                                                                                                        |                                                                                  |
| 13 | 2.a   | Have you checked hemoglobin in the past six months for knowing anemia status? (Probe: Have you undergone any blood test)  | 1. Yes<br>2. No<br>77. Don't know                                                                                                                                                                                                      | If 2.NO OR 77.Don't know skip to question 3<br><br>If 1.Yes move to question 2.b |
| 14 | 2.b   | From where did you get tested? (In case if the hb has been tested multiple times; the most recent one should be recorded) |                                                                                                                                                                                                                                        |                                                                                  |
| 15 | 2.b.1 | Primary health center                                                                                                     | 1. Yes<br>2. No                                                                                                                                                                                                                        |                                                                                  |
| 16 | 2.b.2 | Sub-centre                                                                                                                | 1. Yes<br>2. No                                                                                                                                                                                                                        |                                                                                  |
| 17 | 2.b.3 | Government hospital                                                                                                       | 1. Yes<br>2. No                                                                                                                                                                                                                        |                                                                                  |
| 18 | 2.b.4 | Private hospital                                                                                                          | 1. Yes<br>2. No                                                                                                                                                                                                                        |                                                                                  |
| 19 | 2.b.5 | Private lab                                                                                                               | 1. Yes<br>2. No                                                                                                                                                                                                                        |                                                                                  |
| 20 | 2.b.6 | Others                                                                                                                    | 1. Yes<br>2. No                                                                                                                                                                                                                        |                                                                                  |

|    |       |                                                                              |                                         |                                                                                                                                  |
|----|-------|------------------------------------------------------------------------------|-----------------------------------------|----------------------------------------------------------------------------------------------------------------------------------|
| 21 | 2.b.7 | Others (Specify)                                                             |                                         |                                                                                                                                  |
| 22 | 2.c   | How do you want to report your hemoglobin levels?                            | 1. Record<br>2. Recall<br>3. Don't know | If 3. Don't know skip to question 3.a                                                                                            |
| 23 | 2.d   | Hemoglobin level (value in g/dl)                                             |                                         | If Hb $\geq$ 12 (Women)<br>If Hb $\geq$ 13 for (men)<br>Skip to section 3<br>(No skip if the question filled on basis of recall) |
| 24 | 3.a   | Did you receive/buy iron tablets or iron syrups?<br>(in the past six months) | 1. Yes<br>2. No                         | If 2. No, skip to question 4<br>If 1. Yes goto question 3.b                                                                      |
| 25 | 3.b   | Please mention, from where did you receive?                                  |                                         |                                                                                                                                  |
| 26 | 3.b.1 | ASHA worker                                                                  | 1. Yes<br>2. No                         |                                                                                                                                  |
| 27 | 3.b.2 | ANM / sub – centre                                                           | 1. Yes<br>2. No                         |                                                                                                                                  |
| 28 | 3.b.3 | Primary health center                                                        | 1. Yes<br>2. No                         |                                                                                                                                  |
| 29 | 3.b.4 | Government hospital                                                          | 1. Yes<br>2. No                         |                                                                                                                                  |
| 30 | 3.b.5 | Private doctor / private pharmacy                                            | 1. Yes<br>2. No                         |                                                                                                                                  |
| 31 | 3.b.6 | Anganwadi                                                                    | 1. Yes<br>2. No                         |                                                                                                                                  |
| 32 | 3.b.7 | Others                                                                       | 1. Yes<br>2. No                         |                                                                                                                                  |
| 33 | 3.b.8 | Others (Specify)                                                             |                                         |                                                                                                                                  |

|    |     |                                                                                                                                               |                                                                                                      |                                                                                                                                                                                                                                                                                                                                                  |
|----|-----|-----------------------------------------------------------------------------------------------------------------------------------------------|------------------------------------------------------------------------------------------------------|--------------------------------------------------------------------------------------------------------------------------------------------------------------------------------------------------------------------------------------------------------------------------------------------------------------------------------------------------|
| 34 | 3.c | Did you consume the tablets/ syrups received by you ?<br>(Instruction: Elicit info on habitual consumption/ attitude towards tablet or syrup) | 1. Tablet<br>2. Syrup<br>3. Both iron tablet and syrup<br>4. Didn't consume (either tablet or syrup) | If 1.Tablet skip to section 3 and must fill section 5 and need not fill section 6,<br>If 2.Syrups skip to section 3 and must fill section 6 and need not fill section 5,<br>If 3.Tablet & Syrup skip to section 3 and must fill section 5 & 6,<br>If 4.Dint't consume (either tablet or syrup) goto question 4 and need not fill section 5 and 6 |
| 35 | 4   | If you did not take/ consume iron tablets / syrup, please mention why?                                                                        |                                                                                                      |                                                                                                                                                                                                                                                                                                                                                  |
| 36 | 4.1 | Forgot to take iron tablets                                                                                                                   | 1. Yes<br>2. No                                                                                      |                                                                                                                                                                                                                                                                                                                                                  |
| 37 | 4.2 | Side effects                                                                                                                                  | 1. Yes<br>2. No                                                                                      |                                                                                                                                                                                                                                                                                                                                                  |
| 38 | 4.3 | Not interested                                                                                                                                | 1. Yes<br>2. No                                                                                      |                                                                                                                                                                                                                                                                                                                                                  |
| 39 | 4.4 | No time                                                                                                                                       | 1. Yes<br>2. No                                                                                      |                                                                                                                                                                                                                                                                                                                                                  |
| 40 | 4.5 | Costly                                                                                                                                        | 1. Yes<br>2. No                                                                                      |                                                                                                                                                                                                                                                                                                                                                  |
| 41 | 4.6 | Healthy food is enough.                                                                                                                       | 1. Yes<br>2. No                                                                                      |                                                                                                                                                                                                                                                                                                                                                  |
| 42 | 4.7 | Others                                                                                                                                        | 1. Yes<br>2. No                                                                                      |                                                                                                                                                                                                                                                                                                                                                  |
| 43 | 4.8 | Others (Specify)                                                                                                                              |                                                                                                      |                                                                                                                                                                                                                                                                                                                                                  |
|    |     | <b>Section: 3 Current status of anemia</b>                                                                                                    |                                                                                                      |                                                                                                                                                                                                                                                                                                                                                  |

|    |       |                                                                                                                                                                                                                                            |                                                                                                      |                                                                                                                                                                                                     |
|----|-------|--------------------------------------------------------------------------------------------------------------------------------------------------------------------------------------------------------------------------------------------|------------------------------------------------------------------------------------------------------|-----------------------------------------------------------------------------------------------------------------------------------------------------------------------------------------------------|
| 44 | 5.a   | Are you currently taking iron tablets/syrups?                                                                                                                                                                                              | 1. Tablet<br>2. Syrup<br>3. Both iron tablet and syrup<br>4. Didn't consume (either tablet or syrup) | If 1, go to 5b, and should fill section 5<br>If 2, go to 5b and should fill section 6<br>If 3, go to 5b and should fill both section 5 and 6<br>If 4, skip to section 4 and disable section 5 and 6 |
| 45 | 5.b   | Please provide detailed information on the iron tablets consumed by you (Please show a wrapper for reference)(Instruction: Record this information from the iron tablet blisters available with the participant and upload the photograph) |                                                                                                      |                                                                                                                                                                                                     |
| 46 | 5.b.1 | Brand                                                                                                                                                                                                                                      |                                                                                                      |                                                                                                                                                                                                     |
| 47 | 5.b.2 | Company                                                                                                                                                                                                                                    |                                                                                                      |                                                                                                                                                                                                     |
| 48 | 5.b.3 | Dose                                                                                                                                                                                                                                       |                                                                                                      |                                                                                                                                                                                                     |
| 49 | 5.b.4 | Take photo                                                                                                                                                                                                                                 |                                                                                                      |                                                                                                                                                                                                     |
| 50 | 6.a   | Did you receive de-worming tablets in the past one year from AWC/ sub-centre ?                                                                                                                                                             | 1. Yes<br>2. No                                                                                      | If 1.Yes move to 6.b question and enable 7.a<br><br>If 2.No, Disable 6.a and enable Qn 7.a<br><br>Priority 1 change                                                                                 |
| 51 | 6.b   | How many times did you receive a de-worming tablet in the past year?                                                                                                                                                                       | 1. Once<br>2. Twice<br>3. Not sure                                                                   |                                                                                                                                                                                                     |
| 52 | 7.a   | Did you receive iron tablets in the past one year from ASHA/ AWC ?                                                                                                                                                                         | 1. Yes<br>2. No                                                                                      | If 2.No skip to question 8 and then skip to Q.13<br>If 1.Yes goto question 7.b and disable question 8                                                                                               |
| 53 | 7.b   | If you have received iron tablets in the past one year, from where did you receive them?                                                                                                                                                   |                                                                                                      |                                                                                                                                                                                                     |

|    |       |                                                                                                                                |                                            |  |
|----|-------|--------------------------------------------------------------------------------------------------------------------------------|--------------------------------------------|--|
| 54 | 7.b.1 | ASHA worker                                                                                                                    | 1. Yes<br>2. No                            |  |
| 55 | 7.b.2 | ANM / sub - centre                                                                                                             | 1. Yes<br>2. No                            |  |
| 56 | 7.b.3 | Primary health center                                                                                                          | 1. Yes<br>2. No                            |  |
| 57 | 7.b.4 | Government hospital                                                                                                            | 1. Yes<br>2. No                            |  |
| 58 | 7.b.5 | Anganwadi                                                                                                                      | 1. Yes<br>2. No                            |  |
| 59 | 7.b.6 | Other                                                                                                                          | 1. Yes<br>2. No                            |  |
| 60 | 7.b.7 | Others (Specify)                                                                                                               |                                            |  |
| 61 | 7.c   | Please mention the regularity of iron tablets received by you                                                                  | 1. Weekly<br>2. Weekly twice<br>3. Monthly |  |
| 62 | 8     | If you have not received/ taken the tablet, please mention why? (Instruction: Multiple choices are possible for this question) |                                            |  |
| 63 | 8.1   | No supply                                                                                                                      | 1. Yes<br>2. No                            |  |
| 64 | 8.2   | Not interested                                                                                                                 | 1. Yes<br>2. No                            |  |
| 65 | 8.3   | Forgot                                                                                                                         | 1. Yes<br>2. No                            |  |
| 66 | 8.4   | No time                                                                                                                        | 1. Yes<br>2. No                            |  |
| 67 | 8.5   | Healthy food is enough                                                                                                         | 1. Yes<br>2. No                            |  |
| 68 | 8.6   | Side effects                                                                                                                   | 1. Yes<br>2. No                            |  |
| 69 | 8.7   | Others                                                                                                                         | 1. Yes<br>2. No                            |  |

|    |       |                                                                                                       |                                                                    |                                                                                                                                               |
|----|-------|-------------------------------------------------------------------------------------------------------|--------------------------------------------------------------------|-----------------------------------------------------------------------------------------------------------------------------------------------|
| 70 | 8.8   | Others (Specify)                                                                                      |                                                                    |                                                                                                                                               |
|    |       | <b>Section 5: History of consumption of iron tablets</b>                                              |                                                                    |                                                                                                                                               |
| 71 | 9.a   | Do you regularly consume iron tablet?<br>(Instruction: To elicit regularity of IFA consumption)       | 1. Yes<br>2. No                                                    | 1. If 1.yes, move to Q.9.b and deactivate Q.10<br><br>2. If 2. No, move to Q. 9.b and activate Q.10<br><br>Change on 23-11-2020               |
| 72 | 9.b   | What is the frequency of consuming iron tablets?                                                      | 1. Daily<br>2. Weekly<br>3. Monthly                                | If 1.Daily, skip to question 9.d<br>If 2.Weekly skip to Q.9.c.1 and deactivate Q.9.c.2<br>If 3.Monthly skip to Q.9.c.2 and deactivate Q.9.c.1 |
| 73 | 9.c.1 | How many days did you consume the iron tablets in a week?                                             |                                                                    | Information about weekly or monthly should be captured from 9b and shown as ..... Per week or ..... Per month                                 |
| 74 | 9.c.2 | How many days did you consume the iron tablets in a month?                                            |                                                                    |                                                                                                                                               |
| 75 | 9.d   | What is the time of the day when you take iron tablets?                                               | 1. Before meal<br>2. Immediately after meal<br>99.Others (Specify) |                                                                                                                                               |
| 76 | 9.d.1 | Others (Specify)                                                                                      |                                                                    |                                                                                                                                               |
| 77 | 9.e   | How many tablets have you consumed in a month?<br>(Instruction: Please provide the number of tablets) |                                                                    |                                                                                                                                               |



|    |       |                                                                                                                                                                        |                 |                                                                                                                                         |
|----|-------|------------------------------------------------------------------------------------------------------------------------------------------------------------------------|-----------------|-----------------------------------------------------------------------------------------------------------------------------------------|
| 78 | 9.f   | For how many months did you consume the iron tablets?<br>(Instruction: History of IFA tablet consumption. Count backwards from the current month)                      |                 |                                                                                                                                         |
| 79 | 9.g   | Have you experienced any side effects while consuming the iron tablet?                                                                                                 | 1. Yes<br>2. No | If 2.No, skip to section 7.<br>If Q3.c answered 2.syrup or 3.both iron tablet and syrup skip to section 6<br>If 1.Yes goto question 9.h |
| 80 | 9.h   | If you experienced any side effects while taking the iron tablets, please mention what are they (Instruction: Record all the side effects reported by the participant) |                 |                                                                                                                                         |
| 81 | 9.h.1 | Constipation                                                                                                                                                           | 1. Yes<br>2. No |                                                                                                                                         |
| 82 | 9.h.2 | Diarrhea                                                                                                                                                               | 1. Yes<br>2. No |                                                                                                                                         |
| 83 | 9.h.3 | Nausea, Vomiting                                                                                                                                                       | 1. Yes<br>2. No |                                                                                                                                         |
| 84 | 9.h.4 | Pain in abdomen                                                                                                                                                        | 1. Yes<br>2. No |                                                                                                                                         |
| 85 | 9.h.5 | Black stools                                                                                                                                                           | 1. Yes<br>2. No |                                                                                                                                         |
| 86 | 9.h.6 | Others                                                                                                                                                                 | 1. Yes<br>2. No |                                                                                                                                         |
| 87 | 9.h.7 | Others (Specify)                                                                                                                                                       |                 |                                                                                                                                         |
| 88 | 9.i   | What did you do after experiencing the side-effects?                                                                                                                   |                 |                                                                                                                                         |
| 89 | 9.i.1 | Stopped taking tablets completely                                                                                                                                      | 1.Yes<br>2. No  |                                                                                                                                         |
| 90 | 9.i.2 | Stopped for few days and continued                                                                                                                                     | 1.Yes<br>2. No  |                                                                                                                                         |
| 91 | 9.i.3 | Changed doctor                                                                                                                                                         | 1.Yes<br>2. No  |                                                                                                                                         |

|                                                    |       |                                                                                                |                 |                                                                                                                                   |
|----------------------------------------------------|-------|------------------------------------------------------------------------------------------------|-----------------|-----------------------------------------------------------------------------------------------------------------------------------|
| 92                                                 | 9.i.4 | Continued in spite of side effects                                                             | 1.Yes<br>2. No  |                                                                                                                                   |
| 93                                                 | 9.i.5 | Others                                                                                         | 1.Yes<br>2. No  |                                                                                                                                   |
| 94                                                 | 9.i.6 | Others (Specify)                                                                               |                 |                                                                                                                                   |
| 95                                                 | 10    | If you are not consuming iron tablets regularly, please mention why?                           |                 |                                                                                                                                   |
| 96                                                 | 10.1  | Forgot to take iron tablets                                                                    | 1. Yes<br>2. No |                                                                                                                                   |
| 97                                                 | 10.2  | Side effects                                                                                   | 1. Yes<br>2. No |                                                                                                                                   |
| 98                                                 | 10.3  | Not interested                                                                                 | 1. Yes<br>2. No |                                                                                                                                   |
| 99                                                 | 10.4  | No time                                                                                        | 1. Yes<br>2. No |                                                                                                                                   |
| 100                                                | 10.5  | Costly                                                                                         | 1. Yes<br>2. No |                                                                                                                                   |
| 101                                                | 10.6  | Healthy food is enough                                                                         | 1. Yes<br>2. No |                                                                                                                                   |
| 102                                                | 10.7  | Others                                                                                         | 1. Yes<br>2. No |                                                                                                                                   |
| 103                                                | 10.8  | Others (Specify)                                                                               |                 |                                                                                                                                   |
| <b>Section 6: History of consuming iron syrups</b> |       |                                                                                                |                 |                                                                                                                                   |
| 104                                                | 11.a  | Do you regularly consume iron syrup?<br>(Instruction: To elicit regularity of IFA consumption) | 1. Yes<br>2. No | 1. If 1.yes, move to Q.11.b and deactivate Q.12<br><br>2. If 2. No, move to Q. 11.b and activate Q.12<br><br>Change on 23-11-2020 |

|     |        |                                                                                                                                                                                                                                  |                                                                    |                                                                                                                                  |
|-----|--------|----------------------------------------------------------------------------------------------------------------------------------------------------------------------------------------------------------------------------------|--------------------------------------------------------------------|----------------------------------------------------------------------------------------------------------------------------------|
| 105 | 11.b   | What is the frequency of consuming iron syrups?                                                                                                                                                                                  | 1. Daily<br>2. Weekly<br>3. Monthly                                | If 1.Daily, skip to Q.11d<br>If 2.Weekly skip to Q11.c.1 and disable Q11.c.2<br>If 3.Monthly skip to Q11.c.2 and disable Q11.c.1 |
| 106 | 11.c.1 | How many days did you consume the iron syrup in a week?                                                                                                                                                                          |                                                                    |                                                                                                                                  |
| 107 | 11.c.2 | How many days did you consume the iron syrup in a month?                                                                                                                                                                         |                                                                    |                                                                                                                                  |
| 108 | 11.d   | What is the time of the day when you take the iron syrup?                                                                                                                                                                        | 1. Before meal<br>2. Immediately after meal<br>99.Others (Specify) |                                                                                                                                  |
| 109 | 11.d.1 | Others (Specify)                                                                                                                                                                                                                 |                                                                    |                                                                                                                                  |
| 110 | 11.e   | For how many months you have consumed iron syrup?                                                                                                                                                                                |                                                                    |                                                                                                                                  |
| 111 | 11.f   | In a month, how many bottles of iron syrup do you consume?                                                                                                                                                                       |                                                                    |                                                                                                                                  |
| 112 | 11.g   | What is the quantity of syrup consumed by you (in ml) ?<br>(Approximate quantity of syrup consumed in the past week to be understood from the bottle and the measuring cup/spoon used. If spoon, 1 tsp= 5 ml and 1 tbsp.= 10 ml) |                                                                    |                                                                                                                                  |
| 113 | 11.h   | Have you experienced any side effects while consuming the iron syrup?                                                                                                                                                            | 1. Yes<br>2. No                                                    | If 2.No skip to Section 7<br>If 1.Yes goto question 11.i                                                                         |
| 114 | 11.i   | If you experienced any side effects while taking the iron syrups, please mention what are they (Instruction: Record all the side effects reported by the participant)                                                            |                                                                    |                                                                                                                                  |
| 115 | 11.i.1 | Constipation                                                                                                                                                                                                                     | 1. Yes<br>2. No                                                    |                                                                                                                                  |
| 116 | 11.i.2 | Diarrhea                                                                                                                                                                                                                         | 1. Yes<br>2. No                                                    |                                                                                                                                  |

|     |        |                                                                     |                 |  |
|-----|--------|---------------------------------------------------------------------|-----------------|--|
| 117 | 11.i.3 | Nausea/ vomiting                                                    | 1. Yes<br>2. No |  |
| 118 | 11.i.4 | Pain in abdomen                                                     | 1. Yes<br>2. No |  |
| 119 | 11.i.5 | Black stools                                                        | 1. Yes<br>2. No |  |
| 120 | 11.i.6 | Others                                                              | 1. Yes<br>2. No |  |
| 121 | 11.i.7 | Others (Specify)                                                    |                 |  |
| 122 | 11.j   | What did you do after experiencing the side-effects?                |                 |  |
| 123 | 11.j.1 | Stopped taking syrups completely                                    | 1. Yes<br>2. No |  |
| 124 | 11.j.2 | Stopped for few days and continued                                  | 1. Yes<br>2. No |  |
| 125 | 11.j.3 | Changed doctor                                                      | 1. Yes<br>2. No |  |
| 126 | 11.j.4 | Continued in-spite of side effects                                  | 1. Yes<br>2. No |  |
| 127 | 11.j.5 | Others                                                              | 1. Yes<br>2. No |  |
| 128 | 11.j.6 | Others (Specify)                                                    |                 |  |
| 129 | 12     | If you are not consuming iron syrups regularly, please mention why? |                 |  |
| 130 | 12.1   | Forgot to take iron syrup                                           | 1. Yes<br>2. No |  |
| 131 | 12.2   | Side effects                                                        | 1. Yes<br>2. No |  |
| 132 | 12.3   | Not interested                                                      | 1. Yes<br>2. No |  |
| 133 | 12.4   | No time                                                             | 1. Yes<br>2. No |  |

|     |      |                                                                                                                                                                               |                                                                                                                                                                              |                                                          |
|-----|------|-------------------------------------------------------------------------------------------------------------------------------------------------------------------------------|------------------------------------------------------------------------------------------------------------------------------------------------------------------------------|----------------------------------------------------------|
| 134 | 12.5 | Costly                                                                                                                                                                        | 1. Yes<br>2. No                                                                                                                                                              |                                                          |
| 135 | 12.6 | Healthy food is enough                                                                                                                                                        | 1. Yes<br>2. No                                                                                                                                                              |                                                          |
| 136 | 12.7 | Others                                                                                                                                                                        | 1. Yes<br>2. No                                                                                                                                                              |                                                          |
| 137 | 12.8 | Others (Specify)                                                                                                                                                              |                                                                                                                                                                              |                                                          |
|     |      | <b>Section:7 Information on habitual intake of foods affecting iron absorption</b>                                                                                            |                                                                                                                                                                              |                                                          |
| 138 | 13   | Do you have the habit of taking tea or coffee along with meals?                                                                                                               | 1. Yes, always<br>2. Yes, sometimes<br>3. No<br>4. Don't have the habit of taking tea/coffee                                                                                 |                                                          |
| 139 | 14   | Do you have the habit of eating fruits such as guava/ orange/ papaya along with meals?<br>(Instruction: The response will pertain to the intake of any of these three fruits) | 1. Yes, always<br>2. Yes, sometimes<br>2. No<br>3. Don't have the habit of eating these fruits                                                                               |                                                          |
| 140 | 15   | How frequently do you eat non-vegetarian food?                                                                                                                                | 1. No, I don't eat non-veg<br>2. Yes, once in a while<br>3. Yes, once in a month<br>4. Yes, weekly once<br>5. Yes, weekly 2-3 times<br>6. Yes, daily<br>7. Weekly, 4-6 times |                                                          |
| 141 | 16.a | Did you consume fortified beverages in the last one month?<br>(Instruction: Fortified beverages examples are Horlicks, Boost, Complan)                                        | 1. Yes<br>2. No                                                                                                                                                              | If 2.No skip to Section 8<br>If 1.Yes goto question 16.b |
| 142 | 16.b | Approximately, how frequently did you consume the fortified beverages?                                                                                                        | 1. Daily<br>2. Weekly 2-3 times<br>3. Weekly once<br>4. Monthly once<br>5. Weekly, 4-6 times                                                                                 |                                                          |

|     |      |                                                                                                                                                                       |                                                                                              |                                                                                                                                  |
|-----|------|-----------------------------------------------------------------------------------------------------------------------------------------------------------------------|----------------------------------------------------------------------------------------------|----------------------------------------------------------------------------------------------------------------------------------|
|     |      | <b>Section8: Morbidity</b>                                                                                                                                            |                                                                                              |                                                                                                                                  |
| 143 | 17   | Did you suffer from fever/cold during the past two weeks?                                                                                                             | 1. Yes<br>2. No                                                                              |                                                                                                                                  |
| 145 | 18   | Did you suffer from acute respiratory tract infection during the past two weeks?<br>(Instruction: Fever lasting for more than 3 days along with breathing difficulty) | 1. Yes<br>2. No                                                                              |                                                                                                                                  |
| 147 | 19   | Did you have diarrhea during the past two weeks?<br>(loose stools - 6 or more episodes/day, requiring medication)                                                     | 1. Yes<br>2. No                                                                              |                                                                                                                                  |
| 149 | 20   | Did you suffer from vomiting/ nausea in the past two weeks?                                                                                                           | 1. Yes<br>2. No                                                                              |                                                                                                                                  |
| 151 | 21   | Did you suffer from pneumonia/ bronchitis in the past two weeks                                                                                                       | 1. Yes<br>2. No                                                                              |                                                                                                                                  |
|     |      | <b>Section 9: Alcohol and tobacco use</b>                                                                                                                             |                                                                                              |                                                                                                                                  |
| 152 | 22.a | Do you have the habit of drinking alcohol?                                                                                                                            | 1. Yes<br>2. No                                                                              | If 2.No, skip to question 23.a<br>If 1.Yes goto question 22.b                                                                    |
| 153 | 22.b | Mention the frequency                                                                                                                                                 | 1. Almost every day<br>2. Twice or thrice in a week<br>3. Once in a week<br>4. Occassionally |                                                                                                                                  |
| 154 | 23.a | Do you have the habit of tobacco usage?<br>(Instruction: Chewing, Smoking, Inhaling-Snuff)                                                                            | 1. Yes<br>2. No                                                                              | If 2.No skip to Section 10 for women<br><br>If 1.Yes goto question 23.b<br>Fill question 28 and 29 and end the interview for men |

|                                                      |        |                                                                                                    |                                                                                                                                      |                                                                                                                                                                                 |
|------------------------------------------------------|--------|----------------------------------------------------------------------------------------------------|--------------------------------------------------------------------------------------------------------------------------------------|---------------------------------------------------------------------------------------------------------------------------------------------------------------------------------|
| 155                                                  | 23.b   | Mention the frequency                                                                              | 1. Almost every day<br>2. Twice or thrice in a week<br>3. Once in a week<br>4. Occassionally                                         |                                                                                                                                                                                 |
| <b>Section 10: Menstrual history only NPNL-women</b> |        |                                                                                                    |                                                                                                                                      |                                                                                                                                                                                 |
| 156                                                  | 24     | Marital Status                                                                                     | 1. Single (never married)<br>2. Married<br>3. Widowed and not remarried<br>4. Divorced and not remarried<br>5. Married but separated | If 1.Single de-activate questions 25.a, 25.b, 25.c<br>If 2.Married or 3.Widowed and not remarried or 4.Divorced and not remarried or 5.Married but seperated goto question 25.a |
| 157                                                  | 25.a   | Do you have children?                                                                              | 1. Yes<br>2. No                                                                                                                      | If 2.No go to 26.a<br>If 1.Yes goto question 25.b                                                                                                                               |
| 158                                                  | 25.b   | How many children do you have?                                                                     |                                                                                                                                      |                                                                                                                                                                                 |
| 159                                                  | 25.c   | What is the age of your youngest child?<br>(Completed years)                                       |                                                                                                                                      | If the input value is 0 then only 25.c.1 should be enabled else disable 25.c.1                                                                                                  |
| 160                                                  | 25.c.1 | What is the age of your youngest child? (Completed Months)                                         |                                                                                                                                      |                                                                                                                                                                                 |
| 161                                                  | 26.a   | Have you attained menopause?<br>(Instruction: Ask whether they are presently having menstruation). | 1. Yes<br>2. No<br>99. Others (Specify)                                                                                              | If 1.Yes goto 26.b<br>If 2.No.Others goto question 26.c<br>If 99.others go to 26a.1 and after filling, skip to 27                                                               |
| 162                                                  | 26.a.1 | Others (Specify)                                                                                   |                                                                                                                                      |                                                                                                                                                                                 |
| 163                                                  | 26.b   | Please mention the age at menopause                                                                |                                                                                                                                      |                                                                                                                                                                                 |
| 164                                                  | 26.c   | When was your last menstrual cycle?                                                                |                                                                                                                                      |                                                                                                                                                                                 |

|     |    |                                                     |                                                                                                  |  |
|-----|----|-----------------------------------------------------|--------------------------------------------------------------------------------------------------|--|
| 165 | 27 | Are you using any birth control measures currently? | 1. Permanent (tubectomy)<br>2. Temporary (Copper-T, pills etc.,)<br>3. None<br>4. Not applicable |  |
|     |    | <b>Section: 11 Height &amp; Weight</b>              |                                                                                                  |  |
| 166 | 28 | Height (In cm)                                      |                                                                                                  |  |
| 167 | 29 | Weight (In Kg)                                      |                                                                                                  |  |



**Supplementary table 4: Technical Advisory Group members**

| Name                      | Affiliation                                                               |
|---------------------------|---------------------------------------------------------------------------|
| Dr.Harshpal Singh Sachdev | Sitaram Bhartia Institute of Science and Research, New Delhi, Chairperson |
| Dr.Prema Ramachndra       | Nutrition Foundation of India, New Delhi                                  |
| Dr.Sila Deb               | Ministry of Health and Family Welfare, New Delhi                          |
| Dr. L. Jeyaseelan         | Christian Medical College, Vellore                                        |
| Dr. Ravindra Mohan Pandey | All India Institute of Medical Sciences, New Delhi                        |

\* Late Dr M K Bhan chaired the Technical Advisory Group till his sad demise on 26<sup>th</sup> January 2020.

**Supplementary table 5: Data safety monitoring board members**

| Name                      | Affiliation                                                                                      |
|---------------------------|--------------------------------------------------------------------------------------------------|
| Dr. Ravindra Mohan Pandey | All India Institute of Medical Sciences, New Delhi, (Chairperson)                                |
| Dr. Renu Saxena           | All India Institute of Medical Sciences, New Delhi                                               |
| Dr. Madhavan Nair         | National Institute of Nutrition (Retired)                                                        |
| Dr. Siddarth Ramji        | Professor of Pediatrics and Neonatology and former Dean, Maulana Azad Medical College, New Delhi |
| 4. Dr. Sree Kumaran Nair  | Jawaharlal Institute of Postgraduate Medical Education and Research, Pondicherry                 |
| 6. Dr.Vanamail Perumal    | All India Institute of Medical Sciences, New Delhi                                               |
